# Laminin $\alpha$ 1 orchestrates VEGFA functions in the ecosystem of colorectal carcinoma

E. Mammadova-Bach<sup>1-5</sup>, T. Rupp<sup>1-4\*</sup>, C. Spenlé<sup>1-4+</sup>, I. Jivkov<sup>1-4</sup>, P. Shankaranarayanan<sup>1-4</sup>, A. Klein<sup>1-4</sup>, L. Pisarsky<sup>1-4,6</sup>, A. Méchine-Neuville<sup>7</sup>, G. Cremel<sup>1-4</sup>, M. Kedingler<sup>1-4</sup>, O. De Wever<sup>8</sup>, N. Ambartsumian<sup>9</sup>, S. Robine<sup>10</sup>, E. Pencreach<sup>11-12</sup>, D. Guenot<sup>11</sup>, J.G. Goetz<sup>1-4\*</sup>, P. Simon-Assmann<sup>1-4</sup>, G. Orend<sup>1-4\*</sup> and O. Lefebvre<sup>1-4\*</sup>

<sup>1</sup>Inserm U1109, MN3T, Strasbourg, F-67200, France.

<sup>2</sup>Université de Strasbourg, Strasbourg, F-67000, France.

<sup>3</sup>LabEx Medalis, Université de Strasbourg, Strasbourg, F-67000, France.

<sup>4</sup>Fédération de Médecine Translationnelle de Strasbourg (FMTS), Strasbourg, F-67000, France.

<sup>5</sup>present address, Inserm UMR-S 949, Etablissement Français du Sang-Alsace, Strasbourg, F-67065, France.

<sup>6</sup>present Adress, Public Health Sciences Division/Translational Research Program, Fred Hutchinson Cancer Research Center, Seattle, Washington 98109, USA.

<sup>7</sup>Department of Anatomy and Pathology, CHRU Hautepierre, Strasbourg, F-67200, France.

<sup>8</sup>Laboratory of Experimental Cancer Research, Department of Radiotherapy and Nuclear Medicine, Ghent University Hospital, Ghent, 9000, Belgium.

<sup>9</sup>Institut for Cancer Biology, Copenhagen, DK-2100, Denmark.

<sup>10</sup>Institut Curie, Paris, F-75248, France.

<sup>11</sup>EA 3430, Université de Strasbourg, Strasbourg, F-67000, France.

<sup>12</sup>Plateforme de Génétique Moléculaire des Cancers, Hôpitaux Universitaires de Strasbourg, Strasbourg, F-67098, France.

+ equal contribution, \* co-corresponding authors

**Running title:** Laminin  $\alpha$ 1 promotes colon tumorigenesis

**Key words:** Laminin  $\alpha$ 1, colorectal cancer, tumor angiogenesis, VEGFA, cancer associated cancer.

**Abbreviations:** BM, basement membrane; ECM, extracellular matrix; LM, laminin; vLM $\alpha$ 1, villin-LM $\alpha$ 1 transgenic mice; CAFs, cancer-associated fibroblasts; IF, immunofluorescence; VEGF, vascular endothelial growth factor.

## Additional information

### Financial support:

This work was supported by INSERM, Ligue contre le Cancer (OL, GO), Institut National du Cancer (PSA, GO), the Association pour la Recherche sur le Cancer and l'Hôpital de Hautepierre, Strasbourg (GO). EMB, TR and CS were recipients of a fellowship from the Ligue contre le Cancer and IJ was supported by the Fondation pour la Recherche Médicale.

### Correspondence:

Jacky G.Goetz, [jacky.goetz@inserm.fr](mailto:jacky.goetz@inserm.fr)

Gertraud Orend, [gertraud.orend@inserm.fr](mailto:gertraud.orend@inserm.fr)

Olivier Lefebvre, [olivier.lefebvre@inserm.fr](mailto:olivier.lefebvre@inserm.fr)

### Conflicts of interest:

The authors declare no conflicts of interest.

### Manuscript content :

Introduction+Results+Discussion+Legends, 4968 words, 7 figures and supplemental data.

## **Summary**

Tumor stroma remodeling is a key feature of malignant tumors and can promote cancer progression. Laminins are major constituents of basement membranes that physically separate the epithelium from the underlying stroma. By employing mouse models expressing high and low levels of the laminin  $\alpha 1$  chain (LM $\alpha 1$ ), we highlighted its implication in a tumor-stroma crosstalk, thus leading to increased colon tumor incidence, angiogenesis and tumor growth. The underlying mechanism involves attraction of carcinoma-associated fibroblasts by LM $\alpha 1$ , VEGFA expression triggered by the complex integrin  $\alpha 2\beta 1$ -CXCR4 and binding of VEGFA to LM-111, which in turn promotes angiogenesis, tumor cell survival and proliferation. A gene signature comprising LAMA1, ITGB1, ITGA2, CXCR4 and VEGFA has negative predictive value in colon cancer. Together, this information opens novel opportunities for diagnosis and anti-cancer targeting.

## Introduction

Cancer progression is a multistep process, where the crosstalk between tumor, stromal cells and extracellular matrix (ECM) fosters the survival, proliferation and invasion of tumor cells in (1). Tumor cells and tumor associated stromal cells such as endothelial cells, carcinoma associated fibroblasts (CAFs) and immune cells secrete soluble factors and express specific ECM molecules which are different from that of normal tissues (1).

Laminins (LMs) are heterotrimeric glycoproteins essential for the formation of a highly organized basement membrane (BM), which serves as a barrier between epithelial and mesenchymal tissues (2). The LM family comprises at least 15 described isoforms of LM trimers that are composed of an  $\alpha$ ,  $\beta$  and  $\gamma$  chain (3). We and others have shown that LM $\alpha$ 1 knock out (KO) mice die *in utero* due to the absence of the extra embryonic Reichert's BM (4,5). However, mice with a Sox2-driven conditional KO of LM $\alpha$ 1 (LM $\alpha$ 1<sup>ck<sup>o</sup></sup>) in embryonic tissues or a point mutation in the LN domain (Y265C) of LM $\alpha$ 1 are viable (6,7). Yet, these mice exhibit several defects in the retina and the central nervous system (8,9). In humans, patients with biallelic mutations in LAMA1 display cerebellar dysplasia with occasional retinal dystrophy (10,11) altogether suggesting a pivotal role of LM $\alpha$ 1 in tissue homeostasis.

As major components of BMs, LMs play a well-known role in cancer, where they could be considered as barriers for cancer cell dissemination. For example, high levels of LMs were found in serum of patients with cancer of the ovary, breast and upper gastrointestinal tract (13–17)

Recently, analysis of tumoral exosomes revealed the presence of LMs (17,18) and high expression of LMs in serum correlates with poor prognosis in colorectal carcinoma patients (15,19). LM-111 has been suggested to promote a malignant phenotype such as enhanced lung metastasis formation from melanoma cells (20). Moreover, tumor cells with forced expression of LM $\alpha$ 1 in tumor cells favors tumorigenesis in immune compromised mice (21,22). Yet, very little is known about the underlying mechanisms.

Here, we have used novel transgenic mouse models with ectopic expression of LM $\alpha$ 1 in the intestinal epithelium to determine the effects of LM $\alpha$ 1 on colon tumorigenesis upon chemically (AOM/DSS) (23) and genetically (mutated APC) (24) triggered tumor induction. We demonstrated that LM $\alpha$ 1 promotes tumor formation and angiogenesis by initiating an intimate crosstalk between cancer and stromal cells. We observed that CAFs are attracted by LM $\alpha$ 1, and induce VEGFA expression that is tightly regulated by a newly-identified complex of integrin  $\alpha$ 2 $\beta$ 1 and CXCR4. VEGFA binds to LM-111, increasing tumor cell survival and proliferation. Our newly identified signaling axis comprising LM $\alpha$ 1, integrin  $\alpha$ 2 $\beta$ 1, CXCR4 and VEGFA correlates with shorter relapse-free survival in colorectal cancer patients. This information may open novel opportunities for diagnosis and targeting of colorectal cancer.

## Results

### Colon tumor incidence and growth is enhanced in transgenic mice overexpressing LM $\alpha$ 1

To study how carcinogen treatment affects colon tumorigenesis in context of high LM $\alpha$ 1 we have generated transgenic mice with high expression of LM $\alpha$ 1. The murine LM $\alpha$ 1 cDNA was cloned and expressed under the control of the villin promoter (vLM $\alpha$ 1, **Fig. 1A**), driving specific and high expression of the transgene in the epithelium of the gut and along the entire colon (25,26). Resulting transgenic mice (vLM $\alpha$ 1) strongly express LM $\alpha$ 1 in the colon whereas LM $\alpha$ 1 levels were very low in wildtype littermates (**Fig. S1A, B**). Moreover, LM $\alpha$ 1 is expressed in the BM of the colon crypt region of transgenic mice, but not in normal control colon tissue (**Fig. 1B, C**).

High levels of LM $\alpha$ 1 had no impact on animal health or survival and did not induce any macroscopical tissue abnormalities in the gut of older mice. Finally, LM $\alpha$ 1 overexpressing mice did not spontaneously develop tumors even after 48 months (data not shown), altogether suggesting that high LM $\alpha$ 1 *per se* does not induce tissue abnormalities nor does it foster tumor formation.

Colon carcinogenesis in the mouse was induced by administration of carcinogenic azoxymethan (AOM) or a combination of AOM together with pro-inflammatory dextran sodium sulfate (DSS) in the drinking water (23). Both models lead to intramucosal colon carcinoma formation with different states of transformation after 9 months (AOM) and 2 months (AOM/DSS), respectively eventually leading to a pT2 phenotype (**Fig. S1C, D**). These models closely mimic the human pathology in terms of consecutive events, evolving from *in situ* (pTis) to infiltrating (pT1-pT2) tumors (23,27). To determine whether LM $\alpha$ 1 enhances colon tumorigenesis, we assessed the tumor incidence in vLM $\alpha$ 1 transgenic mice subjected to carcinogen treatment (**Fig. 1D**). Carcinogen treatment leads to tumors in every single vLM $\alpha$ 1 mouse (100%) in contrast to only 36% and 50% of wildtype littermates (AOM,

AOM/DSS respectively). When vLM $\alpha$ 1 expressing mice were crossed with APC<sup>+1638N</sup> mice, that lack an allele of the APC tumor suppressor gene (24), we observed a 75% intestinal tumor incidence in compound vLM $\alpha$ 1/APC<sup>+1638N</sup> mice, that was higher than the 17% tumor incidence seen in control littermates (**Fig. 1D**). These results suggest that gut specific overexpression of LM $\alpha$ 1 significantly promotes tumorigenesis in the chemically and genetically induced carcinogenesis models. We then focused the rest of the study on the AOM/DSS treatment that leads to earlier tumor onset. First, AOM/DSS treated vLM $\alpha$ 1 mice have increased tumor numbers and volume (**Fig. 1E, S1E**), with tumor displaying increased mRNA and protein expression of LM $\alpha$ 1 (**Fig. 1F, G, S1F**). LM $\alpha$ 1 was strongly expressed in the stroma of AOM/DSS-induced tumors with a high abundance in close vicinity of the cancer cells suggesting that LM $\alpha$ 1 may be expressed by tumor and stromal cells (**Fig. 1F, G**). We then determined apoptosis and proliferation by measuring caspase 3/7 activity and Ki67 expression, respectively. AOM/DSS treatment reduces apoptosis and increases the proliferation index in vLM $\alpha$ 1 mice (**Fig. 1H, I**), suggesting that LM $\alpha$ 1 mediates a potential synergism in survival and proliferation during tumor onset and growth. This pivotal role for LM $\alpha$ 1 in colon carcinogenesis, was further supported using two grafting models with cells that express abundant and lowered levels of LM $\alpha$ 1. Subcutaneous injection of HCT116shLM $\alpha$ 1 colon carcinoma cells (**Fig. S1G**) led to smaller tumors than HCT116 control cells which endogenously express LM $\alpha$ 1 (**Fig. S1H**). Similarly, HT29LM $\alpha$ 1 tumors overexpressing LM $\alpha$ 1 (21) are bigger than HT29 control tumors (**Fig S1I**). Altogether our results showed that LM $\alpha$ 1 abundance correlates with tumor incidence and growth in the four analyzed tumor models.

### **LM $\alpha$ 1 promotes tumor cell survival, proliferation, angiogenesis and pericyte coverage**

Angiogenesis and pericyte coverage of vessels are important drivers of tumor growth (28,29). We thus determined vessel density in AOM/DSS induced vLM $\alpha$ 1 colon tumors. Increased expression of LM $\alpha$ 1 correlated with increased vessel density in mice treated with AOM/DSS (**Fig. 2A-C**). In addition, pericyte-covered blood vessels were increased in

carcinogen-induced vLM $\alpha$ 1 tumors (**Fig. 2D-F**). Similarly, vessel density and pericyte coverage were increased in both grafted tumor models expressing high LM $\alpha$ 1 protein levels (**Fig. 1C, F, S2A-H**). In summary, our results demonstrate that LM $\alpha$ 1 promotes formation of tumor blood vessels and coverage by pericytes.

### **Carcinoma associated fibroblasts are attracted by LM $\alpha$ 1**

Since CAFs can stimulate angiogenesis (30) and are increased in tumor xenografts overexpressing LM $\alpha$ 1 (21), we assessed the abundance of CAFs in our models. Both staining for  $\alpha$ SMA and S100A4, which are common markers for CAFs, were increased in vLM $\alpha$ 1 transgenic mice treated with AOM/DSS (**Fig. 3A-F**). This suggests that increased LM $\alpha$ 1 recruits CAFs to the stroma of colon carcinoma. A similar result was obtained in xenograft models with tuned levels of LM $\alpha$ 1, where expression levels of LM $\alpha$ 1 positively correlate with the presence of CAFs (**Fig. S3A-E**).

The observation that CAFs, endothelial cells and pericytes are recruited in stroma of tumors with higher LM $\alpha$ 1 levels prompted us to test the possibility that LM $\alpha$ 1 attracted them into the TME. We thus assessed *in vitro* transmigration of CAFs, endothelial cells and pericytes in a Boyden chamber assay towards purified LM-111 (**Fig. 3G**) or conditioned medium (CM) collected from HT29LM $\alpha$ 1 cells (**Fig. 3H**). We found that LM $\alpha$ 1 enhanced CAF transmigration without stimulating transmigration of endothelial cells (HMECs, HUVECs) or pericytes (**Fig. 3G, H**). This data suggest that while LM $\alpha$ 1 efficiently attracts CAFs, but not endothelial cells nor pericytes, which could explain the increased abundance of CAFs in the LM $\alpha$ 1-overexpressing tumors.

### **LM $\alpha$ 1 induces expression of pro-angiogenic molecules**

Using a RNAseq approach, we took advantage of the HT29 grafting model that allows to discriminate between stromal and host contribution to LM $\alpha$ 1-triggered responses due to assignment to mouse (stroma) and (human) tumor specific genes using the Xenome algorithm (31). We performed genome wide expression analysis of tumors (RNAseq, GEO

accession number GSE84296) and cultured cells (Affymetrix, GEO accession number GSE83747). This analysis revealed a significant differential expression of genes in dependence of LM $\alpha$ 1 (**Tables S1 to S3**). Gene Ontology analysis and data found in the literature revealed that more than 17% of the genes (62 out of 362) induced in stromal cells, encode molecules regulating angiogenesis (**Fig. 4A, Table S4**). In addition, cancer cells also highly express pro-angiogenic genes in the LM $\alpha$ 1 overexpressing tumors (**Fig. 4B, Table S5**). However, the stromal and tumor pro-angiogenic transcriptomes are mostly distinct. Interestingly, the list of angiogenesis related genes of stromal origin included several well-known pro-angiogenic molecules such as VEGFA and CXCR4 (**Fig. 4A, Table S4**), two candidates we considered potentially relevant in LM $\alpha$ 1-associated angiogenesis as corroborated below.

#### **VEGFA expressed by CAFs triggers endothelial tubulogenesis in response to LM $\alpha$ 1**

We further investigated the role of pro-angiogenic VEGFA in LM $\alpha$ 1-associated angiogenesis (32). Moreover, two transcription factors known to induce VEGFA, namely c-Fos (33) and Wt1 (Wilms tumor gene 1, (34) were upregulated 3-fold in the stromal compartment of HT29LM $\alpha$ 1 tumors, potentially involved in inducing stromal VEGFA (**Tables S1, S4**). In tumor cells VEGFA levels were not altered irrespective of LM $\alpha$ 1 (**Table S1-5**). This was further validated by measuring VEGFA expression in AOM/DSS-induced tumors. We observed increased VEGFA levels following LM $\alpha$ 1 upregulation (**Fig. 4C**). Analysis of the tumor xenografts with tuned expression levels for LM $\alpha$ 1 further supported this result as VEGFA was found increased in tumors with higher LM $\alpha$ 1 levels (**Fig. 4C, S4A**). This was not the case for tumor cell derived VEGFA that was unaffected by LM $\alpha$ 1 levels (**Fig. 4C, S4A**). Altogether, our results suggest that LM $\alpha$ 1 elevates VEGFA expression in stromal cells.

We next investigated which stromal cells express VEGFA in response to LM $\alpha$ 1 and cultured fibroblasts, endothelial cells and pericytes on a LM-111 substratum before measuring VEGFA expression. We observed increased VEGFA expression only in CAFs and neither in



normal fibroblasts (IMR90, MEF), nor in endothelial cells or pericytes (**Fig. 4D, S4B**). This observation suggests that LM $\alpha$ 1 stimulates VEGFA expression in CAFs, which could act as the primary source for VEGFA-mediated angiogenesis. We thus addressed whether VEGFA contributes to the LM $\alpha$ 1-associated angiogenic phenotype. We measured the proliferation and tubulogenesis potential of HUVECs upon addition of conditioned medium (CM) collected from CAFs grown on LM-111. While cell growth was not affected by LM-111 (**Fig. S4C**), CM of LM-111-instructed CAFs increased HUVEC tubulogenesis (**Fig. 4E-G**). We then treated endothelial cells with CM of LM-111-instructed CAFs together with the VEGFA neutralizing antibody bevacizumab (35). This drug treatment largely reduced closed loop formation of the LM-111-instructed CM (**Fig. 4H-J**). These results demonstrate that stromal VEGFA plays a pivotal role in LM $\alpha$ 1 promoted endothelial tubulogenesis.

### **Laminin-111 induces VEGFA expression in CAFs through an integrin $\alpha$ 2 $\beta$ 1/CXCR4 complex**

We further analyzed how adhesion to LM-111 induces VEGFA expression in CAFs, and focused on integrins and CXCR4. Indeed, integrins mediate adhesion to LM-111 (36,37) and regulate VEGFA expression (38). Additionally, LM-111 increases expression of CXCR4 (39), and CXCL12 and VEGFA can synergistically trigger tumor angiogenesis (40). Blocking integrin  $\alpha$ 2 or  $\beta$ 1, but not  $\alpha$ 6, significantly reduced VEGFA expression levels in CAFs plated on a LM-111 substratum (**Fig. 5A, Fig. S5A**). Interestingly, only CAFs highly express CXCL12 (**Fig. S5B**) and overexpress its receptor, CXCR4, in response to LM-111 (**Fig. S5C**), validating our RNA-seq analysis of HT29LM $\alpha$ 1 tumors indicating elevated expression of CXCR4 in stromal cells (**Table S4**). These results suggest that CXCL12/CXCR4 could mediate VEGFA induction in response to LM-111. We then took advantage of integrin blocking antibodies and observed that blocking integrin  $\alpha$ 2 $\beta$ 1 reduced LM-111 induced CXCR4 expression in CAFs (**Fig. S5D**). We further measured VEGFA expression in CAFs grown on LM-111, upon triggering CXCR4 signaling with CXCL12, and found a further increase in VEGFA (**Fig. 5B, S5E**). Moreover VEGFA expression was dependent on integrin

$\alpha 2\beta 1$  (**Fig. 5C, S5F**). Finally, we observed that LM-111-induced VEGFA expression was effectively CXCR4-dependent (**Fig. 5D, S5G**).

Because LM-111 triggered VEGFA expression in CAFs by a mechanism that involves integrin  $\alpha 2\beta 1$  and CXCR4 and since inhibition of each molecule blocked LM-111-induced VEGFA expression (**Fig. 5A-D**), we considered a potential interdependence of signaling by a physical complex of the two receptors. We thus exposed CAFs to a LM-111 substratum and assessed interaction of integrin  $\alpha 2\beta 1$  and CXCR4 using a proximity ligation assay. While CXCR4 and integrin  $\alpha 2\beta 1$  physically interact in steady-state conditions, LM-111 further promotes this complex formation (**Fig. 5E-I**). Altogether, our results suggest that *in vitro*, high levels of tumor cell-derived LM $\alpha 1$  trigger VEGFA expression in CAFs by a mechanism that involves LM-111-dependent integrin  $\alpha 2\beta 1$ /CXCR4 complex formation.

#### **LM-111 promotes tumor cell survival and proliferation via its binding to VEGFA**

Because CM from LM $\alpha 1$ -exposed CAFs promoted endothelial tubulogenesis, we asked whether this CM had also an effect on survival and/or proliferation of tumor cells. Here, we used the HT29 carcinoma cells with tuned LM $\alpha 1$  expression levels. Upon plating HT29 cells on LM-111 together with apoptosis-inducing staurosporine, we observed no effect on apoptosis in the parental cells with CM from CAFs grown on LM-111 or plastic. Surprisingly, less apoptosis was noted when CM from LM-111-instructed CAFs was added to HT29LM $\alpha 1$  cells (**Fig. 6A**). In addition, CM from LM-111-instructed CAFs increased proliferation of HT29LM $\alpha 1$  cells. In particular, an increased number of HT29LM $\alpha 1$  cells entered the S and G2/M phases, which were accompanied by a decrease in the G0/G1 phase (**Fig. 6B**). These data suggest that LM-111-instructed CM of CAFs promotes survival and proliferation of LM $\alpha 1$  overexpressing tumor cells. Thus, LM $\alpha 1$  may promote survival and growth signaling in tumor cells by a synergy between pericellular LM $\alpha 1$  and LM $\alpha 1$ -induced soluble factors.

As VEGFA largely mimicked the LM $\alpha 1$  effect on endothelial tubulogenesis (**Fig. 4E-J**) and VEGFA had previously been shown to promote tumor cell survival (32), we considered

VEGFA as candidate factor of the LM-111-instructed CM promoting survival and proliferation in tumor cells. VEGF121 and VEGF165 isoforms of VEGFA have been shown to display distinct angiogenic properties where VEGFA165 is more active, via its interaction with the co-receptor NRP1 (41). Interestingly, whereas staurosporin-triggered apoptosis was reduced by VEGFA165 in HT29LM $\alpha$ 1 cells (yet not in the parental cells), this was not the case with VEGFA121 (**Fig. 6C, D**). Moreover, VEGF165 enhanced entry of HT29LM $\alpha$ 1 cells into S and G2/M phases which was accompanied by a reduction in the G0/G1-phase (**Fig. 6E**). No effect was seen when using VEGFA121 (**Fig. 6F**). In summary, our experiments revealed that VEGF165 is promoting survival and proliferation of tumor cells thus mimicking the LM $\alpha$ 1 effect. Moreover, response to VEGFA depends on cell adhesion to LM $\alpha$ 1 suggesting a combined signaling by LM $\alpha$ 1 and VEGFA.

Because LMs and VEGFA possess heparin-binding domains and heparin binding sites respectively (42,43), we considered that VEGFA and LM $\alpha$ 1 act via physical interaction. We used surface plasmon resonance spectroscopy to measure binding of VEGFA165 to sensor chip-adsorbed LM-111. We observed that VEGFA165 binds LM-111 in a dose dependent manner with a Kd of  $4.7 \times 10^{-8}$  M (**Fig. 6G**), in the range of the previously reported binding of VEGFA165 to heparan sulfated glycosaminoglycans ( $2.4 \times 10^{-8}$  M, (44)). VEGF121 lacks the heparin binding sites (41) and did not interact with LM-111 (**Fig. 6G**). Thus, the heparin binding activity in VEGFA165 is crucial for the interaction with LM-111 to mediate the survival and growth promoting effect of LM $\alpha$ 1.

### **Prognostic value of the LM $\alpha$ 1-integrin $\alpha$ 2 $\beta$ 1-CXCR4-VEGFA axis for poor survival**

Altogether, our results suggest that LM $\alpha$ 1 is involved in colon carcinogenesis. We investigated whether this was specific to LM $\alpha$ 1 and determined relative expression levels of the twelve LM chains in 39 primary human colorectal cancer specimens (**Table S6**). While LM $\alpha$ 5 transcripts were the most abundant (not shown), LM $\alpha$ 1 was the most highly induced (18-fold) LM molecule in tumor tissue compared to adjacent non-tumor tissue (**Fig. 7A**).

LM $\alpha$ 1 mRNA is already highly induced at early tumor stage (pT1) and LM $\alpha$ 1 expression levels do not correlate with tumor stage (**Table S6**). In addition to LM $\alpha$ 1, transcripts of two other LM chains, LM $\alpha$ 5 (2.9-fold) and LM $\beta$ 1 (2.4-fold) were also significantly overexpressed in colon tumor tissue. In contrast, transcript expression of LM $\alpha$ 3 (-3.6-fold), LM $\beta$ 3 (-4.7-fold) and LM $\gamma$ 3 (-8.4-fold) appeared lower in the tumor tissue (**Fig. 7A**).

We further observed that whereas LM $\alpha$ 1 was mostly absent from non-tumor tissue, LM $\alpha$ 1 could be found highly expressed in the TME, predominantly at the interface between cancer cells and in the tumor stroma (**Fig. 7B, C**), resembling LM $\alpha$ 1 expression in AOM/DSS induced murine tumors (**Fig. 1F, G**). This analysis revealed a complex deregulated expression of LMs in colon tumors, where LM $\alpha$ 1 is the most significantly deregulated LM chain.

Finally, we wondered whether stromal LM $\alpha$ 1 associated short signature comprising LAMA1, ITGB1, ITGA2, CXCR4 and VEGFA potentially correlates with patient prognosis by using publicly available mRNA expression data sets from two cohorts of patients (n=332) with colorectal cancer (GSE14333 and GSE17536). We observed that combined high expression of the five genes strongly correlates with reduced disease free survival in both cohorts (**Fig. 7D, E**). Our results suggest that LM $\alpha$ 1 together with VEGFA, ITGB1, ITGA2 and CXCR4 are interesting markers of patient outcome in colorectal adenocarcinoma with targeting opportunities.

## Discussion

Extracellular matrix, and in particular LM $\alpha$ 1, can promote tumorigenesis (21,22) yet the underlying mechanism was elusive. Here, we employed a multi-scale approach (*in vitro* assays, murine models and cancer patients) to discover the molecular mechanism of LM $\alpha$ 1 promoted tumor growth and prognostic value for cancer patients (see summary, **Fig.8**).

Overexpression of LMs is not necessarily enhancing the barrier function of BM, that is often lost during cancer progression (22). Indeed some overexpressed LM isoforms were found to promote growth, protease production and angiogenesis (20). We had recently shown that LM $\alpha$ 1 is induced in inflammatory bowel disease (IBD) by a mechanism that involves p53. We further demonstrated that transgenic mice overexpressing LM $\alpha$ 1 in the intestinal epithelium are less prone to DSS-induced inflammation, suggesting a barrier function of LM $\alpha$ 1. Yet, surprisingly the carcinogen AOM induced more intestinal tumor lesions in vLM $\alpha$ 1 mice (26). Here, we addressed the mechanisms underlying LM $\alpha$ 1 induced tumorigenesis in more details by employing our novel transgenic mouse models expressing high LM $\alpha$ 1 levels and a cancer driving mutation in APC (APC<sup>1638N/+</sup>;(24) or by using conditions driving tumorigenesis (AOM or AOM/DSS) that are relevant for the human disease (23). In addition, we used two colon cancer xenograft models with LM $\alpha$ 1 overexpression or shRNA-mediated LM $\alpha$ 1 knockdown. In all models we observed that LM $\alpha$ 1 overexpression enhanced tumor incidence, tumor growth and, most importantly, stromal activation that increased tumor angiogenesis. Our models are relevant for the human disease since we observed a strong induction of LM $\alpha$ 1 in human colorectal cancers. In addition, LM $\alpha$ 1 is highly abundant in the tumor tissue of colorectal cancer specimens, reaching more than 18-fold increased mRNA levels than in non-tumorigenic tissue.

We further demonstrated that LM $\alpha$ 1 orchestrates the TME by triggering a crosstalk between cancer and stromal cells that tunes VEGFA expression. We identified CAFs as central stromal player that are more abundant in LM $\alpha$ 1 overexpressing tumors suggesting that LM $\alpha$ 1

attracts CAFs into the tumor tissue. Indeed, in cell culture CAFs were attracted by LM-111 which did not apply to other stromal cells.

In addition to VEGFA, CAFs also express CXCL12 that activates CXCR4. Although cancer cells express different chemokine-receptors, CXCR4 is correlated with poor prognosis for colorectal cancer patients (45) and is commonly found in multiple types of cancer, thus strengthening the importance of the CXCL12/CXCR4 axis in progression and metastasis of colon cancer (46). Previously published data suggest a role of CXCR4 on LM-111 dependent tumor cell adhesion and chemotaxis potentially through overexpression of  $\alpha 5$  and  $\beta 3$  integrins (47). Here, we demonstrated for the first time that on a LM-111 substratum a physical complex of CXCR4 and  $\alpha 2\beta 1$  integrin is stimulated, as shown by a proximity ligation assay. Signaling by LM-111 through integrin  $\alpha 2\beta 1$  is crucial for VEGFA induction, as this was blocked by an integrin inhibitory antibody as well as by the CXCR4 inhibitor AMD3100. CXCL12 dependent CXCR4 activation was shown to potentially enhance  $\beta 1$  and in particular  $\alpha 6\beta 1$  integrin dependent adhesion of small cell lung and pancreatic cancer cells on LM, respectively (39,48). Although a physical interaction of CXCR4 with integrin  $\beta 1$  may be inferred from a recent publication demonstrating clustering of  $\beta 1$  integrins in CAFs upon stimulation with CXCL12 (49), a physical interaction and dependence on LM-111 has not yet been demonstrated.

We also provide for the first time evidence that LM-111 binds VEGFA165, that occurred with a Kd in the range described for VEGFA binding to glycosaminoglycans (44). The interaction presumably occurs through the heparin binding site in the LM $\alpha 1$  G domain (42,43). In contrast, due to its lack of heparin binding sites (50), VEGFA121 does not bind to LM-111 and thus has no effect on colon tumor cell proliferation and survival. We further demonstrate that LM-111 binds VEGFA165 and that this form is biologically active in promoting colon cancer cell survival and proliferation on LM-111. The latter could also apply to blood vessel formation since VEGFA165 is inducing angiogenesis (41). It is tempting to speculate that binding of VEGFA to LM $\alpha 1$  may play a similar role as binding of VEGFA to NRP1, since both

molecules bind VEGFA 165 via their heparin binding sites (51) thus potentially stabilizing VEGFA/VEGFR recognition. Most importantly, the LM $\alpha$ 1-integrin  $\alpha$ 2 $\beta$ 1-CXCR4-VEGFA axis correlates with shorter relapse free survival in colorectal carcinoma patients. Thus, the identified crosstalk initiated by high LM $\alpha$ 1 expression in cancer cells and involving integrin  $\alpha$ 2 $\beta$ 1, CXCR4 and VEGFA is clinically relevant. This knowledge might be useful for diagnosis and future combination therapies. FDA-approved drugs targeting CXCR4 and VEGFA are currently tested in clinical combination trials in glioblastoma (NCT01339039). Our results suggest that this combination treatment might also be useful for patients diagnosed with colon cancer irrespective of tumor stage since LM $\alpha$ 1 is already upregulated early in colon tumorigenesis (shown here) as well as in IBD where p53 induces LM $\alpha$ 1 (26). Finally, our novel murine tumor models may be useful in increasing our understanding of vascular BM assembly and barrier function in cancer.

In summary, we demonstrated that ectopically expressed LM $\alpha$ 1 in intestinal tissue plays a Janus role. Whereas ectopically expressed LM $\alpha$ 1 protects from chronic inflammation induced tissue damage in IBD (26), the present study shows that LM $\alpha$ 1 promotes colon tumor incidence, growth and angiogenesis by orchestrating an intricate crosstalk between cells and the LM-111 matrix. LM $\alpha$ 1 expressed by colon cancer cells recruits CAFs that secrete VEGFA in response to concomitant signaling by CXCR4 and integrin  $\alpha$ 2 $\beta$ 1 upon adhesion to the LM-111 substratum. In turn, VEGFA binds to the LM-111 rich substratum, which promotes tumor cell survival and proliferation. VEGFA signaling also promotes angiogenesis leading to more and presumably functional vessels thus supporting tumor growth (**Fig. S6**). The identification of VEGFA, CXCR4 and  $\alpha$ 2 $\beta$ 1 integrin downstream of LM $\alpha$ 1 in colon cancer is of bad prognostic value for patient survival and may open novel opportunities for targeting colon cancer.

## **Material and methods**

### **Human colorectal cancer specimens**

Primary human colorectal tumors of different differentiation state, and normal tissue with no signs of tumorigenesis were obtained from 39 patients with their written consent. All surgical specimens were evaluated and histologically analyzed by an experienced pathologist and classified according to the TNM staging system denominating the tumor (T) stage, presence of lymph nodes (N) and metastasis status (M). Replication error (RER) status of all surgical specimens was determined and provided by the Centre de Ressources Biologiques, (Hôpitaux Universitaires de Strasbourg, Hôpital de Hautepierre, Strasbourg, France). Patient information is listed in Supplementary Table S6. Tumor material and healthy tissue were immediately snap frozen for RNA preparation or was embedded in Tissue-Tek (Labonord, Templemars, France) for immunofluorescence analysis.

### **Cloning of the villin-LM $\alpha$ 1 vector**

Full details of the cloning strategy are available in the supplementary information.

### **Generation of vLM $\alpha$ 1 transgenic mice and of the vLM $\alpha$ 1/APC<sup>+1638</sup> mice**

Transgenesis is described in details in the supplementary information.

### **Azoxymethan (AOM) and AOM/ Dextran Sulfate Sodium (DSS) treatment**

Eight week old wildtype (WT) mice and vLM $\alpha$ 1 littermates were injected intra-peritoneally (i.p.) with AOM (10 mg/kg, Sigma Aldrich, Lyon, France) once per week for 5 weeks. Animals were sacrificed 9 months after the last AOM injection. For a combined AOM/DSS treatment eight week old WT and vLM $\alpha$ 1 littermates were injected i.p. with a single dose of AOM. The day after, 3 % DSS (molecular weight 36,000-50,000 kDa, MP Biomedicals, Illkirch, France) was provided in the drinking water for 5 days. Afterwards mice obtained regular water for 2 months before sacrifice. Tumor size was measured with a caliper and tumor volume was



determined using the following calculation  $V = (\text{width})^2 \times \text{length} / 2$ . Colon tumor tissues were prepared, immediately snap frozen for RNA and protein extraction in liquid nitrogen, or were embedded into Tissue-Tek (Labonord, Templemars, France) for immunofluorescence analysis. Samples were stored at  $-80^{\circ}\text{C}$ . For conventional histology, samples were fixed in formaldehyde (4%), processed for 10  $\mu\text{m}$  paraffin wax sections and stained with hematoxylin-eosin.

## Cell lines

Control HT29 and HT29LM $\alpha$ 1 cells (B8T and H11 clones, respectively) were cultured as previously described (21). Primary cancer associated fibroblasts (CAFs) (52) were infected with a pBABE retroviral vector (Cell Biolabs, Bio-Connect Bv, Huissen, The Netherlands) expressing the hTERT open reading frame, and a pool was selected. The replicative life span of hTERT transduced pool was examined and compared with that of a mock-transduced pool. Immortalized CAFs, mouse embryonic fibroblasts (MEFs kindly provided by R. Chiquet-Ehrismann, Basel, Switzerland) and human normal lung IMR-90 fibroblasts (CCL-186, ATCC, France) were cultured in DMEM supplemented with 10% fetal calf serum (FCS), 1% penicillin-streptomycin (Invitrogen, Life Technologies, Saint Aubin, France). Human immortalized dermal microvascular endothelial cells (HMEC, a gift from Dr E. Van Obberghen-Schilling, Nice, France) were maintained in MCDB 131 medium (Invitrogen) supplemented with 12.5% fetal calf serum, 10 mM glutamine (Invitrogen), EGF (10 ng/mL), bFGF (10 ng/mL), heparin (10  $\mu\text{g}/\text{mL}$ ) and hydrocortisone (1  $\mu\text{g}/\text{mL}$ ), all compounds being from Sigma Aldrich, Lyon, France. The human umbilical vein endothelial cells (HUVEC) were grown according to the manufacturer's instructions in ECGM medium (Promocell, Heidelberg, Germany). Human brain vascular pericytes (ScienCell, USA) were maintained in pericyte medium comprising the basal medium supplemented with 2% fetal bovine serum, 1% penicillin-streptomycin and 1% pericyte growth supplement (ScienCell, USA).

## **Generation of LMa1 knock-down cells**

Lentiviral strategy is fully detailed in the supplementary information.

## **Cell culture assays**

CAFs, IMR-90 cells, MEFs, HMEC and pericytes were plated onto uncoated or on LM-111 coated dishes ( $10\mu\text{g}/\text{cm}^2$ , L2020, Sigma Aldrich, Lyon, France) and cultured in their appropriate medium. CAFs were then incubated for 24 hours with mouse monoclonal function blocking antibodies against human integrin  $\alpha 2\beta 1$  ( $10\mu\text{g}/\text{mL}$ , BHA2.1, Millipore), integrin  $\beta 1$  ( $10\mu\text{g}/\text{mL}$ , 4B4, Beckman Coulter, Fullerton, USA) or with rat monoclonal function blocking antibodies against human integrin  $\alpha 6$  ( $10\mu\text{g}/\text{mL}$ , GoH3, Santa Cruz Biotechnology); controls were performed using mouse or rat monoclonal IgG ( $10\mu\text{g}/\text{mL}$ , Biolegend, Ozyme, St-Quentin-en-Yvelines, France). In certain cases, the AMD3100 inhibitor ( $10\mu\text{g}/\text{mL}$ , Merck, Darmstadt, Germany) or the recombinant human CXCL12/SDF1 $\alpha$  protein ( $100\text{ nM}$ , R&D Systems, Minneapolis, MN, USA) was added to the culture medium for 24 hours concomitantly with antibodies against human integrin  $\alpha 2\beta 1$  or integrin  $\beta 1$ . Cells were then processed for RNA and protein extraction for subsequent qRT-PCR and Elisa assays.

## **Boyden chamber chemo-attraction assay**

Chemo-attraction assays were performed in 24 well Boyden chambers with a polycarbonate filter of  $8\mu\text{m}$  pore size (Falcon, Dutscher, Brumath, France). As a chemoattractant, either conditioned media from HT29 cells (expressing or not LMa1) or purified LM-111 were used. Conditioned media from control HT29 and from HT29LMa1 cells were collected, centrifuged at  $900g$  to remove cell debris and were added to the lower chamber. LM-111 ( $10\mu\text{g}/\text{cm}^2$ ) was coated on the lower surface of the insert. CAFs, HMEC, HUVEC or pericytes were cultured in the upper chamber ( $3 \times 10^3$  cells) and incubated for 6 hours at  $37^\circ\text{C}$  in  $5\% \text{CO}_2$ . Transmigrated cells were then fixed with  $4\% \text{PFA}$ , stained with DAPI and quantified using the ImageJ software and the analyze particles module (National Institutes of Health, USA).

### ***In vitro* angiogenesis assay**

The assay is based on a described protocol where endothelial cells are plated on a polymerised gel of basement membrane molecules (Matrigel) on which they form capillary-like structures (53). The basement membrane extract Matrigel (Corning, New York, USA) was loaded (10  $\mu$ l/well) into 15-well cell culture plates (IBIDI  $\mu$ -Slide Angiogenesis, Biovalley, Nanterre, France) followed by solidification at 37°C in a humidified incubator for one hour. HUVECs were trypsinized, resuspended at  $7 \times 10^4$  cells/well, cultured in conditioned medium from CAFs that have been grown previously on plastic or on LM-111 (Sigma, Lyon, France) for 24 hours and treated or not with 1 or 5  $\mu$ g/ml bevacizumab (Roche, France). After incubation for 7 hours at 37°C, bright field mosaic pictures of the entire well surface were taken (Zeiss Imager Z2 inverted microscope and AxioVision software, Carl Zeiss, Le Pecq, France) at 5X magnification (with a total of 9 pictures per condition). Formation of tubular-like networks was quantified by using the ZEN Blue software (Carl Zeiss, Le Pecq, France) with total number of closed loop structures as read out. A minimum of three independent experiments were performed with five replicates per experiment.

### **Cell cycle and apoptosis analysis**

**For cell cycle analysis, HT29 control and HT29LM $\alpha$ 1 cells** were cultured in 24-well plates ( $1 \times 10^4$  cells/well) for three days and then treated for 24 hours with recombinant VEGFA165 (10ng/ $\mu$ L, R&D systems, Minneapolis, USA) or VEGFA121 (10ng/ $\mu$ L, Prospecbio, East Brunswick, USA). For quantification of apoptosis, cells were treated for 4 hours with the apoptosis inducing agent staurosporine (400nm, Sigma, Lyon, France) as previously described (Qiao et al., 1996), and subsequently treated for 24 hours with the corresponding VEGFA isoforms. After collection, cells were resuspended in 300  $\mu$ L hypotonic fluorochrome solution (5  $\mu$ g propidium iodide, 3.4 mmol/L sodium citrate, and 0.1% Triton X-100 in PBS). DNA content was analyzed by a fluorescence activated cell sorter (FACS, Becton Dickinson, San Diego, USA). Ten thousand events per sample were acquired, and cell cycle distribution

was determined using the ModFit software. The subG1 apoptotic cell population was quantified by the CellQuest computer software. Apoptosis in tumor samples were measured on protein lysates using the caspase-3/7 colorimetric protease assay kit following the manufacturer's instructions (caspase-3/7 Colorimetric Protease Assay Kit, Invitrogen, Life Technologies, Saint Aubin, France).

### **Surface Plasmon Resonance**

Surface Plasmon Resonance-Binding experiments are described in details in the supplementay information.

### **Tumor xenograft experiments**

Ten million cells of each HT29 cell line (control, HT29LM $\alpha$ 1) or 4 million cells of HCT116 (control and HCT116shLM $\alpha$ 1) were injected subcutaneously into 8 week old nude MRF1 female mice (Janvier, La Plaine Saint Denis, France). Mice were sacrificed 4 weeks post injection. For histology and immunostaining, tumors were either fixed overnight in 4% PFA and embedded in paraffin or directly frozen in Tissue-Tek on dry ice. For RNA or protein extraction, samples were directly frozen in liquid nitrogen.

### **Protein extraction, immunoblotting and ELISA**

Proteins were extracted from cells and tissues using lysis buffer (50mM Tris pH 7, 150 mM NaCl, 1% NP-40) and 1% protease inhibitors (cOmplete protease inhibitor cocktail, Roche, Meylan, France). 50  $\mu$ g of protein lysates (quantified by Bradford assay) were separated by SDS PAGE (6%) and transferred onto nitrocellulose membrane (Millipore, Molsheim, France). Membranes were incubated successively with primary (see **Supplemental Table S7**) and with HRP-coupled secondary antibodies followed by detection upon incubation with ECL (Amersham, GE Healthcare, Velizy-Villacoublay, France). Murine and human specific Quantikine ELISA kits (R&D systems, Minneapolis, USA) were used to determine the amounts of VEGFA and of CXCL12. The CXCR4 Elisa kit was used to detect human CXCR4

(CSB-E12825h; Cusabio, CliniSciences, Nanterre, France). Quantification was performed either by using total tumor or cell protein lysates or using conditioned medium from CAFs, MEFs, IMR-90, HMEC and pericytes, following the manufacturer's instructions. Absorbance was measured at 450 nm (Biotek plate reader E800, Biotek, Colmar, France).

### **Immunohistochemistry and immunofluorescence analysis**

For histological analysis, 7  $\mu$ m paraffin sections were deparaffinized with toluene and stained with periodic acid-Schiff reagent and hematoxylin. The primary antibodies used are listed in the **Supplemental Table S7**. For immunohistochemistry, tissue sections were deparaffinized with toluene, then boiled with the antigen retrieval sodium citrate buffer (pH 6) for 10 min. Sections were incubated with primary antibodies overnight at 4°C. Slides were thereafter incubated with biotinylated secondary antibodies (Vector Laboratories, Eurobio/Abcys, Les Ulis, France), amplified with the ABC Elite Vectorstain kit and developed with the DAB kit from Vector Laboratories. Slides were examined using the Zeiss Axio Imager A1 microscope equipped with an A-Plan x5/0.12, an A-Plan x20/0.45 objective and a Zeiss AxioCam Icc3 color camera (Carl Zeiss, Le Pecq, France). For immunofluorescence staining, 7  $\mu$ m cryosections were incubated overnight with primary antibodies, washed three times in PBS and incubated for one hour with Alexa 488- or cyanine 3-conjugated secondary antibodies (Jackson ImmunoResearch Laboratories, West Grove, PA). After washing, nuclei were stained with DAPI (1/30000) and embedded using the FluorSave reagent (Calbiochem-Merck, Lyon France). Slides were examined using an epifluorescence Zeiss Axio imager 2 microscope equipped with a Plan Aplanachromat x20/0.8, a Plan Aplanachromat x40/0.95 objectives and an apotome module. Pictures were taken with a Zeiss AxioCam MRm black and white digital camera. All images were acquired using the Zeiss Axiovision software. Control sections were processed as above with omission of the primary antibodies. Quantifications of immunofluorescence and immunohistochemistry surface signals were done using the ImageJ software and the analyze particles module (National Institutes of Health, USA). Several images per tumor were taken using a 20x objective to cover most of

the tumor surface. Data are presented as average area fraction per tumor in all defined groups. Quantification of the pericyte coverage index of vessels was defined by dividing signals for the average area fraction of NG2 by the average area fraction of CD31.

### **Gene expression analysis**

Gene expression analysis and experiments are described in the supplementary information.

### **Proximity ligation assay**

The proximity ligation assay was employed following the manufacturer's recommendations (Duolink In situ Orange starter kit mouse/rabbit; Sigma-Aldrich, France). CAFs were seeded ( $2 \times 10^4$  cells/well) on uncoated or LM-111 ( $10 \mu\text{g}/\text{cm}^2$ ; Sigma-Aldrich, France) coated Lab-Tek II chamber slides (Dutscher). After cell adhesion and spreading, CAFs were starved overnight, fixed with 1% PFA in PBS for 10 min and permeabilized with 0.1% Triton-PBS for 10 min. Then cells were incubated overnight at  $4^\circ\text{C}$  with both mouse anti-integrin  $\alpha 2\beta 1$  (BHA2.1 clone; 1/100; Millipore) and rabbit anti-CXCR4 (Ab2074; 1/100; Abcam) antibodies. Ligation, amplification and detection of integrin  $\alpha 2\beta 1$  and CXCR4 interactions were visualized using the Duolink kit following manufacturer's instructions. In this procedure, bright fluorescent dots were observed when the two molecules are in close proximity. Images were taken using the epifluorescence Zeiss Axio imager 2 microscope and quantification of dots was performed using Image J software on 11 random fields obtained from 2 independent experiments.

### **Statistical analysis**

Statistical significance of results was analyzed using the GraphPad Prism program version 5.04 and the R open source software version 3.2.1. The Shapiro-Wilk normality test was used to confirm the normality of the data. The statistical difference of Gaussian data sets was analyzed using the Student unpaired two-tailed t test, with Welch's correction in case of unequal variances and the one way ANOVA test followed by a Tukey's multiple comparison

post-test was used for multiple data comparison. For data not following a Gaussian distribution, the permutation test was used and the one-way ANOVA test followed by the permutation multiple comparisons post-test was used for multiple data comparison. Illustrations of these statistical analyses are displayed as the mean +/- standard deviation (SD). Contingency was analyzed using the chi-square test. p-values smaller than 0.05 were considered as significant. \*,  $p < 0.05$ , \*\*,  $p < 0.01$ , \*\*\*,  $p < 0.001$ , \*\*\*\*,  $p < 0.0001$ .

### **Supplemental information**

Supplemental Information includes supplemental materials and methods, Six supplemental figures, eight supplemental tables, the legends to the supplemental display items and references.

### **Acknowledgments**

We thank R. Fodde (Department of Human Genetics, Leiden University Medical Center, The Netherlands) for APC<sup>+/-1638N</sup> mice and the Mouse Clinical Institute (Illkirch-Graffenstaden, France) for the generation of transgenic mice. We also thank R. Chiquet-Ehrismann (Friedrich Miescher Institute for Biomedical Research, Basel, Switzerland) for Mouse Embryonic Fibroblasts, E. Van Obberghen-Schilling (University of Nice-Sophia Antipolis, Nice, France) for HMECs, P. Yurchenco (Robert Wood Johnson Medical School, Piscataway, NJ, USA) for mouse LM $\alpha$ 1 cDNA, L. Sorokin (Institute for Physiological Chemistry and Pathobiochemistry, University of Münster, Münster, Germany), H. Kleinman (The George Washington School of Medicine, Washington, DC, USA), T. Sasaki (Shriners Hospitals for Children, Portland, OR, USA) and D. Gullberg (Department of Biomedicine, University of Bergen, Bergen, Norway) for antibodies and, the Centre de Ressources Biologiques (Hôpital de Hautepierre, Strasbourg, France) for the human tissue biopsies. Sequencing and microarray were performed by the IGBMC Microarray and Sequencing platform (<http://genomeast.igbmc.fr>).

## References

1. Hynes RO. The extracellular matrix: not just pretty fibrils. *Science*. 2009;326:1216–9.
2. Hohenester E, Yurchenco PD. Laminins in basement membrane assembly. *Cell Adhes Migr*. 2013;7:56–63.
3. Aumailley M. The laminin family. *Cell Adhes Migr*. 2013;7:48–55.
4. Miner JH, Li C, Mudd JL, Go G, Sutherland AE. Compositional and structural requirements for laminin and basement membranes during mouse embryo implantation and gastrulation. *Development*. 2004;131:2247–56.
5. Alpy F, Jivkov I, Sorokin L, Klein A, Arnold C, Huss Y, et al. Generation of a conditionally null allele of the laminin alpha1 gene. *Genesis*. 2005;43:59–70.
6. Edwards MM, Lefebvre O. Laminins and retinal vascular development. *Cell Adhes Migr*. 2013;7:82–9.
7. Edwards MM, Mammadova-Bach E, Alpy F, Klein A, Hicks WL, Roux M, et al. Mutations in lama1 disrupt retinal vascular development and inner limiting membrane formation. *JBiolChem*. 2010;285:7697–711.
8. Ichikawa-Tomikawa N, Ogawa J, Douet V, Xu Z, Kamikubo Y, Sakurai T, et al. Laminin  $\alpha$ 1 is essential for mouse cerebellar development. *Matrix Biol*. 2012;31:17–28.
9. Heng C, Lefebvre O, Klein A, Edwards M, Simon-Assmann P, Orend G, et al. Functional role of laminin  $\alpha$ 1 chain during cerebellum development. *Cell Adhes Migr*. 2011;5:480–9.
10. Aldinger KA, Mosca SJ, Tétreault M, Dempsey JC, Ishak GE, Hartley T, et al. Mutations in LAMA1 Cause Cerebellar Dysplasia and Cysts with and without Retinal Dystrophy. *Am J Hum Genet*. 2014;95:227–34.
11. Vilboux T, Malicdan MCV, Chang YM, Guo J, Zerfas PM, Stephen J, et al. Cystic cerebellar dysplasia and biallelic LAMA1 mutations: a lamininopathy associated with tics, obsessive compulsive traits and myopia due to cell adhesion and migration defects. *J Med Genet*. 2016;53:318–29.
12. Sidhom G, Imam M. Evaluation of serum laminin as a tumor marker in breast cancer. *Int J Clin Lab Res*. 1999;29:26–9.
13. Maatta M, Virtanen I, Burgeson R, Autio-Harmainen H. Comparative analysis of the distribution of laminin chains in the basement membranes in some malignant epithelial tumors: the alpha1 chain of laminin shows a selected expression pattern in human carcinomas. *JHistochemCytochem*. 2001;49:711–26.
14. Chu Y, Yang Y, Lin M, Wang Z. Detection of laminin in serum and ascites from patients with epithelial ovarian tumor. *JHuazhongUniv SciTechnolMedSci*. 2002;22:58–9, 68.
15. Saito N, Kameoka S. Serum laminin is an independent prognostic factor in colorectal cancer. *IntJColorectal Dis*. 2005;20:238–44.



16. Aghcheli K, Parsian H, Qujeq D, Talebi M, Mosapour A, Khalilipour E, et al. Serum hyaluronic acid and laminin as potential tumor markers for upper gastrointestinal cancers. *Eur J Intern Med.* 2012;23:58–64.
17. Hoshino A, Costa-Silva B, Shen T-L, Rodrigues G, Hashimoto A, Tesic Mark M, et al. Tumour exosome integrins determine organotropic metastasis. *Nature.* 2015;527:329–35.
18. Melo SA, Luecke LB, Kahlert C, Fernandez AF, Gammon ST, Kaye J, et al. Glypican-1 identifies cancer exosomes and detects early pancreatic cancer. *Nature.* 2015;523:177–82.
19. Renkes P, Felden F, Bigard MA, Gaucher P, Guéant JL. [Physiopathological and clinical value of laminin in digestive neoplasms]. *Gastroentérologie Clin Biol.* 1994;18:328–37.
20. Kikkawa Y, Hozumi K, Katagiri F, Nomizu M, Kleinman HK, Koblinski JE. Laminin-111-derived peptides and cancer. *Cell Adhes Migr.* 2013;7:150–256.
21. De Arcangelis A, Lefebvre O, Mechine-Neuville A, Arnold C, Klein A, Remy L, et al. Overexpression of laminin alpha1 chain in colonic cancer cells induces an increase in tumor growth. *IntJCancer.* 2001;94:44–53.
22. Simon-Assmann P, Orend G, Mammadova-Bach E, Spenle C, Lefebvre O. Role of laminins in physiological and pathological angiogenesis. *Int J Dev Biol.* 2011;55:455–65.
23. De Robertis M, Massi E, Poeta ML, Carotti S, Morini S, Cecchetelli L, et al. The AOM/DSS murine model for the study of colon carcinogenesis: From pathways to diagnosis and therapy studies. *J Carcinog.* 2011;10:9.
24. Fodde R, Edelmann W, Yang K, van Leeuwen C, Carlson C, Renault B, et al. A targeted chain-termination mutation in the mouse *Apc* gene results in multiple intestinal tumors. *ProcNatlAcadSciUSA.* 1994;91:8969–73.
25. Pinto D, Robine S, Jaisser F, El Marjou FE, Louvard D. Regulatory sequences of the mouse villin gene that efficiently drive transgenic expression in immature and differentiated epithelial cells of small and large intestines. *JBiolChem.* 1999;274:6476–82.
26. Spenlé C, Lefebvre O, Lacroute J, Méchine-Neuville A, Barreau F, Blottière HM, et al. The Laminin Response in Inflammatory Bowel Disease: Protection or Malignancy? *PLoS ONE.* 2014;9:e111336.
27. Papanikolaou A, Wang QS, Delker DA, Rosenberg DW. Azoxymethane-induced colon tumors and aberrant crypt foci in mice of different genetic susceptibility. *Cancer Lett.* 1998;130:29–34.
28. Hanahan D, Weinberg RA. Hallmarks of Cancer: The Next Generation. *Cell.* 2011;144:646–74.
29. Jayson GC, Kerbel R, Ellis LM, Harris AL. Antiangiogenic therapy in oncology: current status and future directions. *The Lancet.* 2016;388:518–29.
30. Räsänen K, Vaheri A. Activation of fibroblasts in cancer stroma. *Exp Cell Res.* 2010;316:2713–22.

31. Conway T, Wazny J, Bromage A, Tymms M, Sooraj D, Williams ED, et al. Xenome—a tool for classifying reads from xenograft samples. *Bioinformatics*. 2012;28:i172–8.
32. Goel HL, Mercurio AM. VEGF targets the tumour cell. *Nat Rev Cancer*. 2013;13:871–82.
33. Mar A-C, Chu C-H, Lee H-J, Chien C-W, Cheng J-J, Yang S-H, et al. Interleukin-1 Receptor Type 2 Acts with c-Fos to Enhance the Expression of Interleukin-6 and Vascular Endothelial Growth Factor A in Colon Cancer Cells and Induce Angiogenesis. *J Biol Chem*. 2015;290:22212–24.
34. McCarty G, Awad O, Loeb DM. WT1 Protein Directly Regulates Expression of Vascular Endothelial Growth Factor and Is a Mediator of Tumor Response to Hypoxia. *J Biol Chem*. 2011;286:43634–43.
35. Presta LG, Chen H, O'Connor SJ, Chisholm V, Meng YG, Krummen L, et al. Humanization of an anti-vascular endothelial growth factor monoclonal antibody for the therapy of solid tumors and other disorders. *Cancer Res*. 1997;57:4593–9.
36. Hozumi K, Suzuki N, Nielsen PK, Nomizu M, Yamada Y. Laminin  $\alpha$ 1 Chain LG4 Module Promotes Cell Attachment through Syndecans and Cell Spreading through Integrin  $\alpha$ 2 $\beta$ 1. *J Biol Chem*. 2006;281:32929–40.
37. Barczyk M, Carracedo S, Gullberg D. Integrins. *Cell Tissue Res*. 2009;339:269–80.
38. De S, Razorenova O, McCabe NP, O'Toole T, Qin J, Byzova TV. VEGF–integrin interplay controls tumor growth and vascularization. *Proc Natl Acad Sci U S A*. 2005;102:7589–94.
39. Grzesiak JJ, Smith KC, Burton DW, Deftos LJ, Bouvet M. Integrin-mediated laminin-1 adhesion upregulates CXCR4 and IL-8 expression in pancreatic cancer cells. *Surgery*. 2007;141:804–14.
40. Kryczek I, Lange A, Mottram P, Alvarez X, Cheng P, Hogan M, et al. CXCL12 and Vascular Endothelial Growth Factor Synergistically Induce Neoangiogenesis in Human Ovarian Cancers. *Cancer Res*. 2005;65:465–72.
41. Vempati P, Popel AS, Mac Gabhann F. Extracellular regulation of VEGF: Isoforms, proteolysis, and vascular patterning. *Cytokine Growth Factor Rev*. 2014;25:1–19.
42. Harrison D, Hussain SA, Combs AC, Ervasti JM, Yurchenco PD, Hohenester E. Crystal Structure and Cell Surface Anchorage Sites of Laminin  $\{\alpha\}$ 1LG4-5. *JBiolChem*. 2007;282:11573–81.
43. Miralem T, Steinberg R, Price D, Avraham H. VEGF(165) requires extracellular matrix components to induce mitogenic effects and migratory response in breast cancer cells. *Oncogene*. 2001;20:5511–24.
44. Wu FTH, Stefanini MO, Mac Gabhann F, Popel AS. A Compartment Model of VEGF Distribution in Humans in the Presence of Soluble VEGF Receptor-1 Acting as a Ligand Trap. *PLoS ONE*. 2009;4:e5108.

45. Kim J, Takeuchi H, Lam ST, Turner RR, Wang H-J, Kuo C, et al. Chemokine Receptor CXCR4 Expression in Colorectal Cancer Patients Increases the Risk for Recurrence and for Poor Survival. *J Clin Oncol*. 2005;23:2744–53.
46. Balkwill F. The significance of cancer cell expression of the chemokine receptor CXCR4. *Semin Cancer Biol*. 2004;14:171–9.
47. Engl T, Relja B, Marian D, Blumenberg C, Müller I, Beecken W-D, et al. CXCR4 chemokine receptor mediates prostate tumor cell adhesion through alpha5 and beta3 integrins. *Neoplasia N Y N*. 2006;8:290–301.
48. Hartmann TN, Burger M, Burger JA. The role of adhesion molecules and chemokine receptor CXCR4 (CD184) in small cell lung cancer. *J Biol Regul Homeost Agents*. 2004;18:126–30.
49. Izumi D, Ishimoto T, Miyake K, Sugihara H, Eto K, Sawayama H, et al. CXCL12/CXCR4 activation by cancer-associated fibroblasts promotes integrin  $\beta$ 1 clustering and invasiveness in gastric cancer. *Int J Cancer*. 2016;138:1207–19.
50. Ferrara N. Binding to the Extracellular Matrix and Proteolytic Processing: Two Key Mechanisms Regulating Vascular Endothelial Growth Factor Action. *Mol Biol Cell*. 2010;21:687–90.
51. Mamluk R, Gechtman Z 'ev, Kutcher ME, Gasiunas N, Gallagher J, Klagsbrun M. Neuropilin-1 Binds Vascular Endothelial Growth Factor 165, Placenta Growth Factor-2, and Heparin via Its b1b2 Domain. *J Biol Chem*. 2002;277:24818–25.
52. De Wever O, Nguyen Q-D, Van Hoorde L, Bracke M, Bruyneel E, Gespach C, et al. Tenascin-C and SF/HGF produced by myofibroblasts in vitro provide convergent pro-invasive signals to human colon cancer cells through RhoA and Rac. *FASEB J Off Publ Fed Am Soc Exp Biol*. 2004;18:1016–8.
53. Arnaoutova I, Kleinman HK. In vitro angiogenesis: endothelial cell tube formation on gelled basement membrane extract. *Nat Protoc*. 2010;5:628–35.
54. Qiao L, Koutsos M, Tsai L-L, Kozoni V, Guzman J, Shiff SJ, et al. Staurosporine inhibits the proliferation, alters the cell cycle distribution and induces apoptosis in HT-29 human colon adenocarcinoma cells. *Cancer Lett*. 1996;107:83–9.

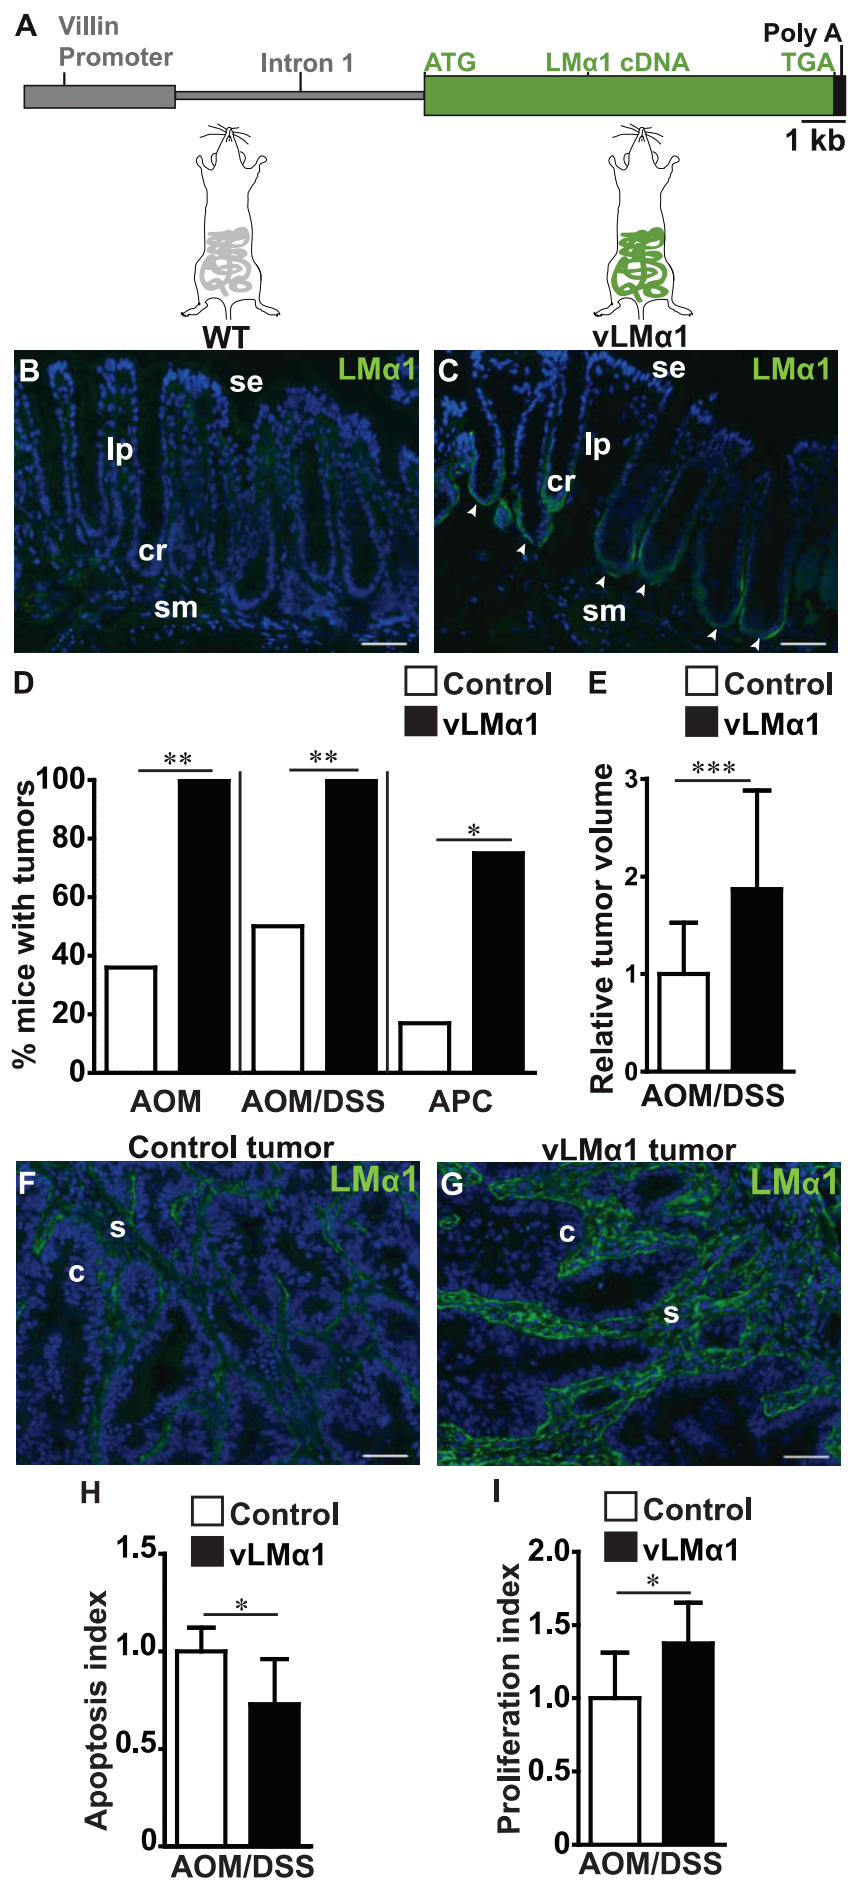

Figure 1

### Figure 1. Impact of LM $\alpha$ 1 on colon cancer incidence and growth

**A**, Schematic representation of the LM $\alpha$ 1 transgene. The murine 3.4 kb villin promoter sequence is followed by the 5.5 kb first intron and the 9 kb murine LM $\alpha$ 1 cDNA. **B, C**, LM $\alpha$ 1 tissue distribution assessed by IF with a LM $\alpha$ 1 antibody (green) in tissue from normal distal colon of a wild type (**B**) and vLM $\alpha$ 1 transgenic mice (**C**). Nuclei were stained with DAPI (blue). Note LM $\alpha$ 1 expression in the BM of the crypt region (arrowheads). se, surface of epithelium; cr, crypt region; lp, lamina propria; sm, sub-mucosa. Scale bar: 50 $\mu$ m. **D**, Tumor incidence in control and vLM $\alpha$ 1 AOM (N=10), AOM/DSS treated (N=12) or APC+/1638 (N=6) mice, chi-square test. **E**, Relative tumor volume in AOM/DSS treated control (n=18), vLM $\alpha$ 1 (n=68). Fold change, mean $\pm$ -SD, permutation test. **F, G**, Tissue expression of LM $\alpha$ 1 assessed by IF with a LM $\alpha$ 1 antibody (green) in colon tumors from AOM/DSS treated control (**F**) and vLM $\alpha$ 1 (**G**) mice. Nuclei were stained with DAPI (blue). c, cancer cells, s, stroma. Scale bar: 50 $\mu$ m. **H**, Apoptosis in tumor lysates determined by quantification of activated caspase-3/7. Fold change, mean $\pm$ -SD, N=8 mice, n=8 tumors, permutation test. **I**, Proliferation determined by counting Ki67 positive cells per randomly chosen tumor area. Fold change, mean $\pm$ -SD, N=8 mice, n=8 tumors, Student's t-test.

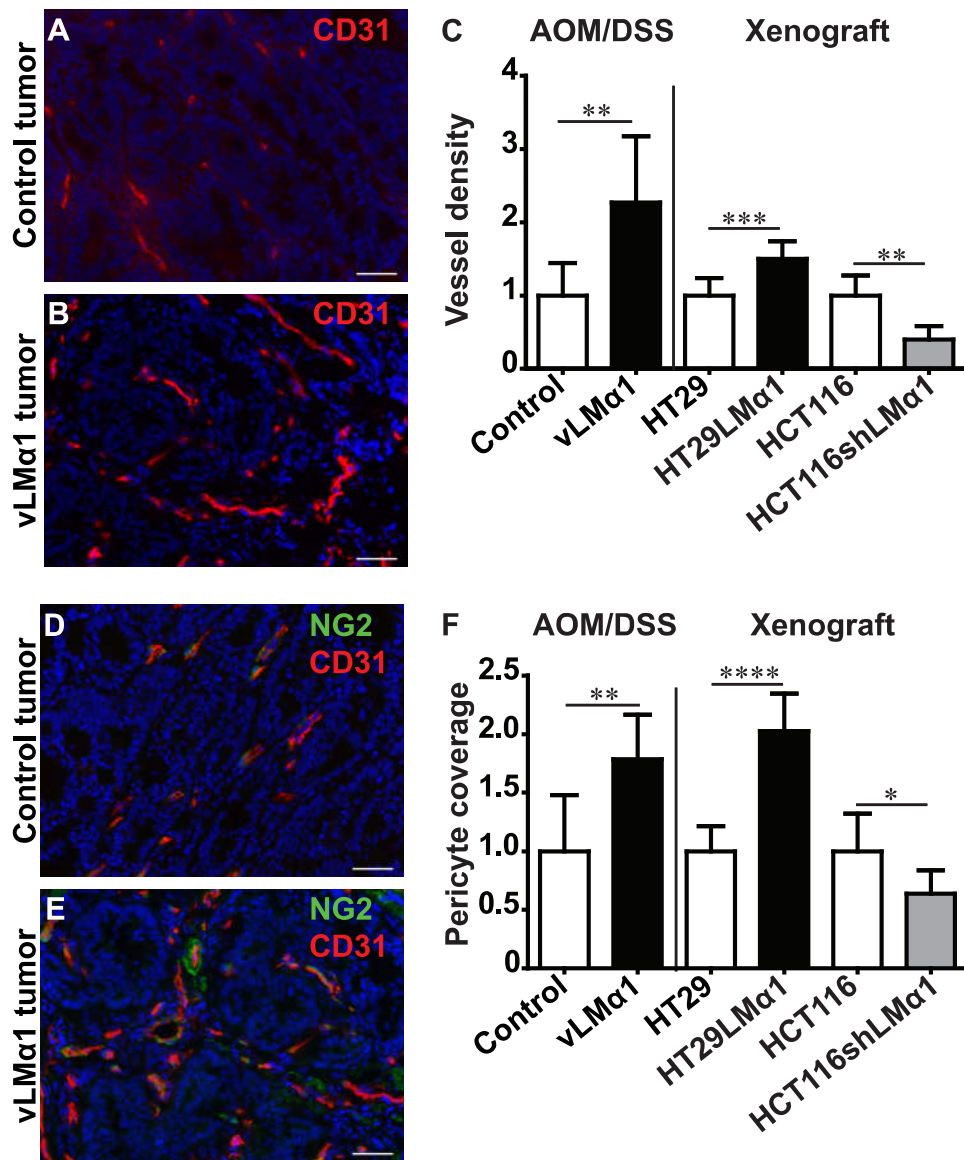

Figure 2

**Figure 2. Impact of LM $\alpha$ 1 on apoptosis, proliferation, tumor angiogenesis and vessel maturation**

**A, B, D, E**, Representative examples of IF staining results on sections from AOM/DSS control (**A, D**) and vLM $\alpha$ 1 (**B, E**) tumors for CD31 (red, **A, B**), combined NG2 (green) and CD31 (red, **D, E**). Nuclei were stained with DAPI (blue). Scale bar = 50 $\mu$ m. **C**, Assessment of vessel density by quantification of CD31 signal per area of tumor tissue. Fold change, mean  $\pm$ SD, N=8 mice, n=8 tumors, Student's t-test; for HCT116 tumors, permutation test. **F**, Pericyte coverage in AOM/DSS induced colon cancer or xenograft tumors determined as ratio of NG2/CD31 staining per area. Fold change, mean  $\pm$ SD, N=8 mice, n=8 tumors, Student's t-test; for HCT116 tumors, permutation test.



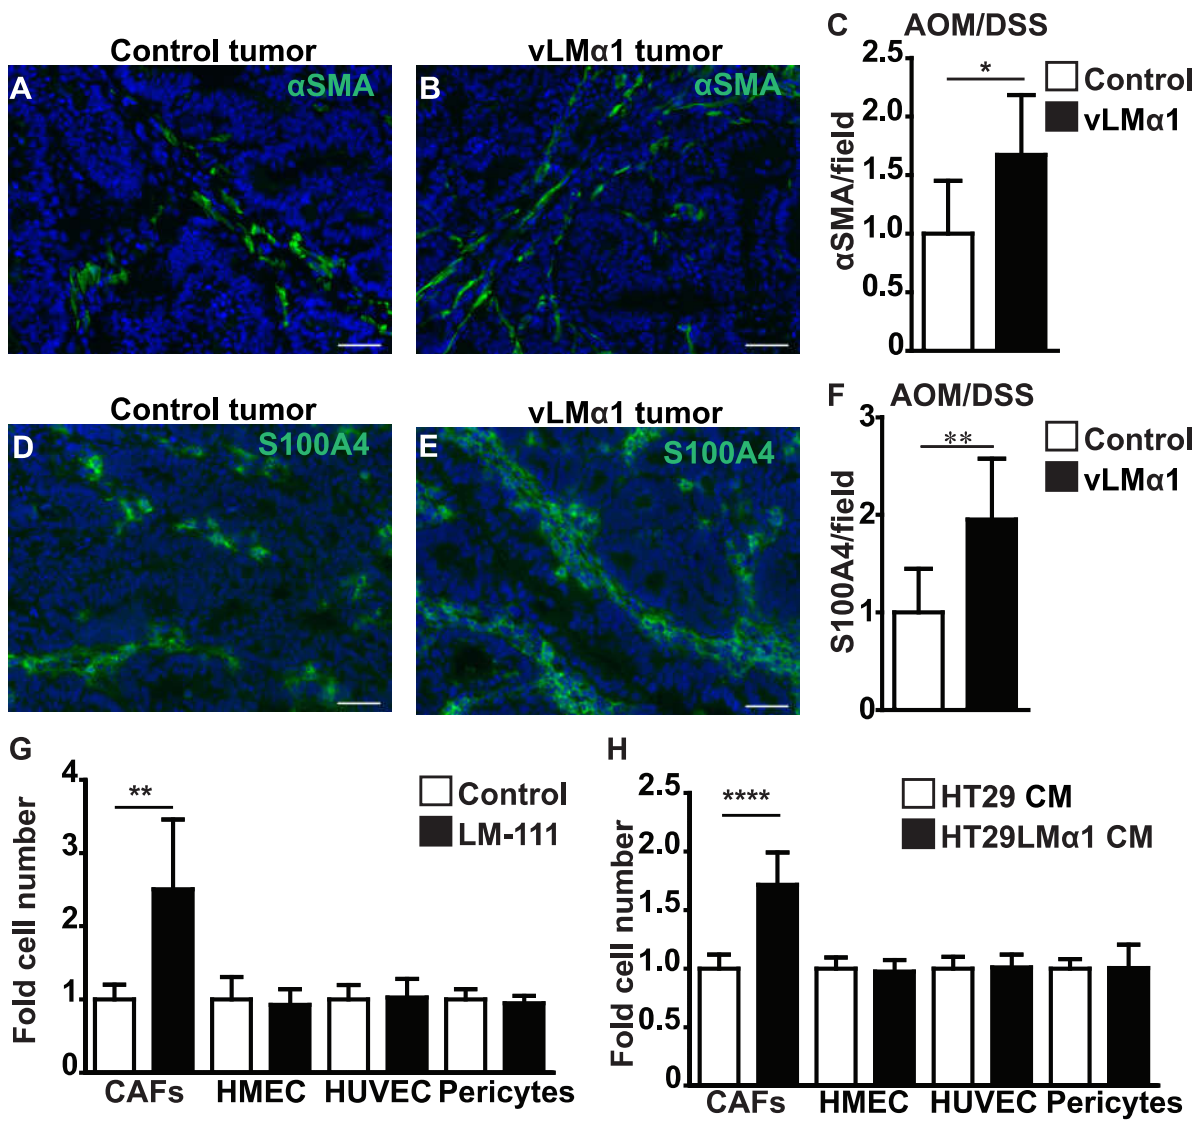

Figure 3



### Figure 3. Impact of LM $\alpha$ 1 on fibroblast attraction

**A, B, D, E**, Representative images of  $\alpha$ SMA (green) positive fibroblasts in AOM/DSS induced control (**A**) and vLM $\alpha$ 1 (**B**) tumors, of S100A4 (green) positive fibroblasts in AOM/DSS induced colon tumors from control (**D**) and vLM $\alpha$ 1 (**E**) mice. Nuclei were stained with DAPI (blue). Scale bar = 50 $\mu$ m. **C**, Quantification of  $\alpha$ SMA staining signal per area on tissue sections from AOM/DSS induced colon cancer. Fold change, mean $\pm$ SD, N=8 mice, n=8 tumors, permutation test. **F**, Relative S100A4 signal per area on tissue sections from AOM/DSS control and vLM $\alpha$ 1 tumors. Fold change, mean $\pm$ SD, N=8 mice, n=8 tumors, permutation test. **G, H**, Boyden chamber assay to assess haptotaxis of CAFs, HMEC, HUVEC and pericytes towards LM-111 or an uncoated surface (control) (**G**) or towards condition medium from HT29LM $\alpha$ 1 and control HT29 cells (**H**). Fold change, mean $\pm$ SD, 3 independent experiments in triplicate, permutation test.

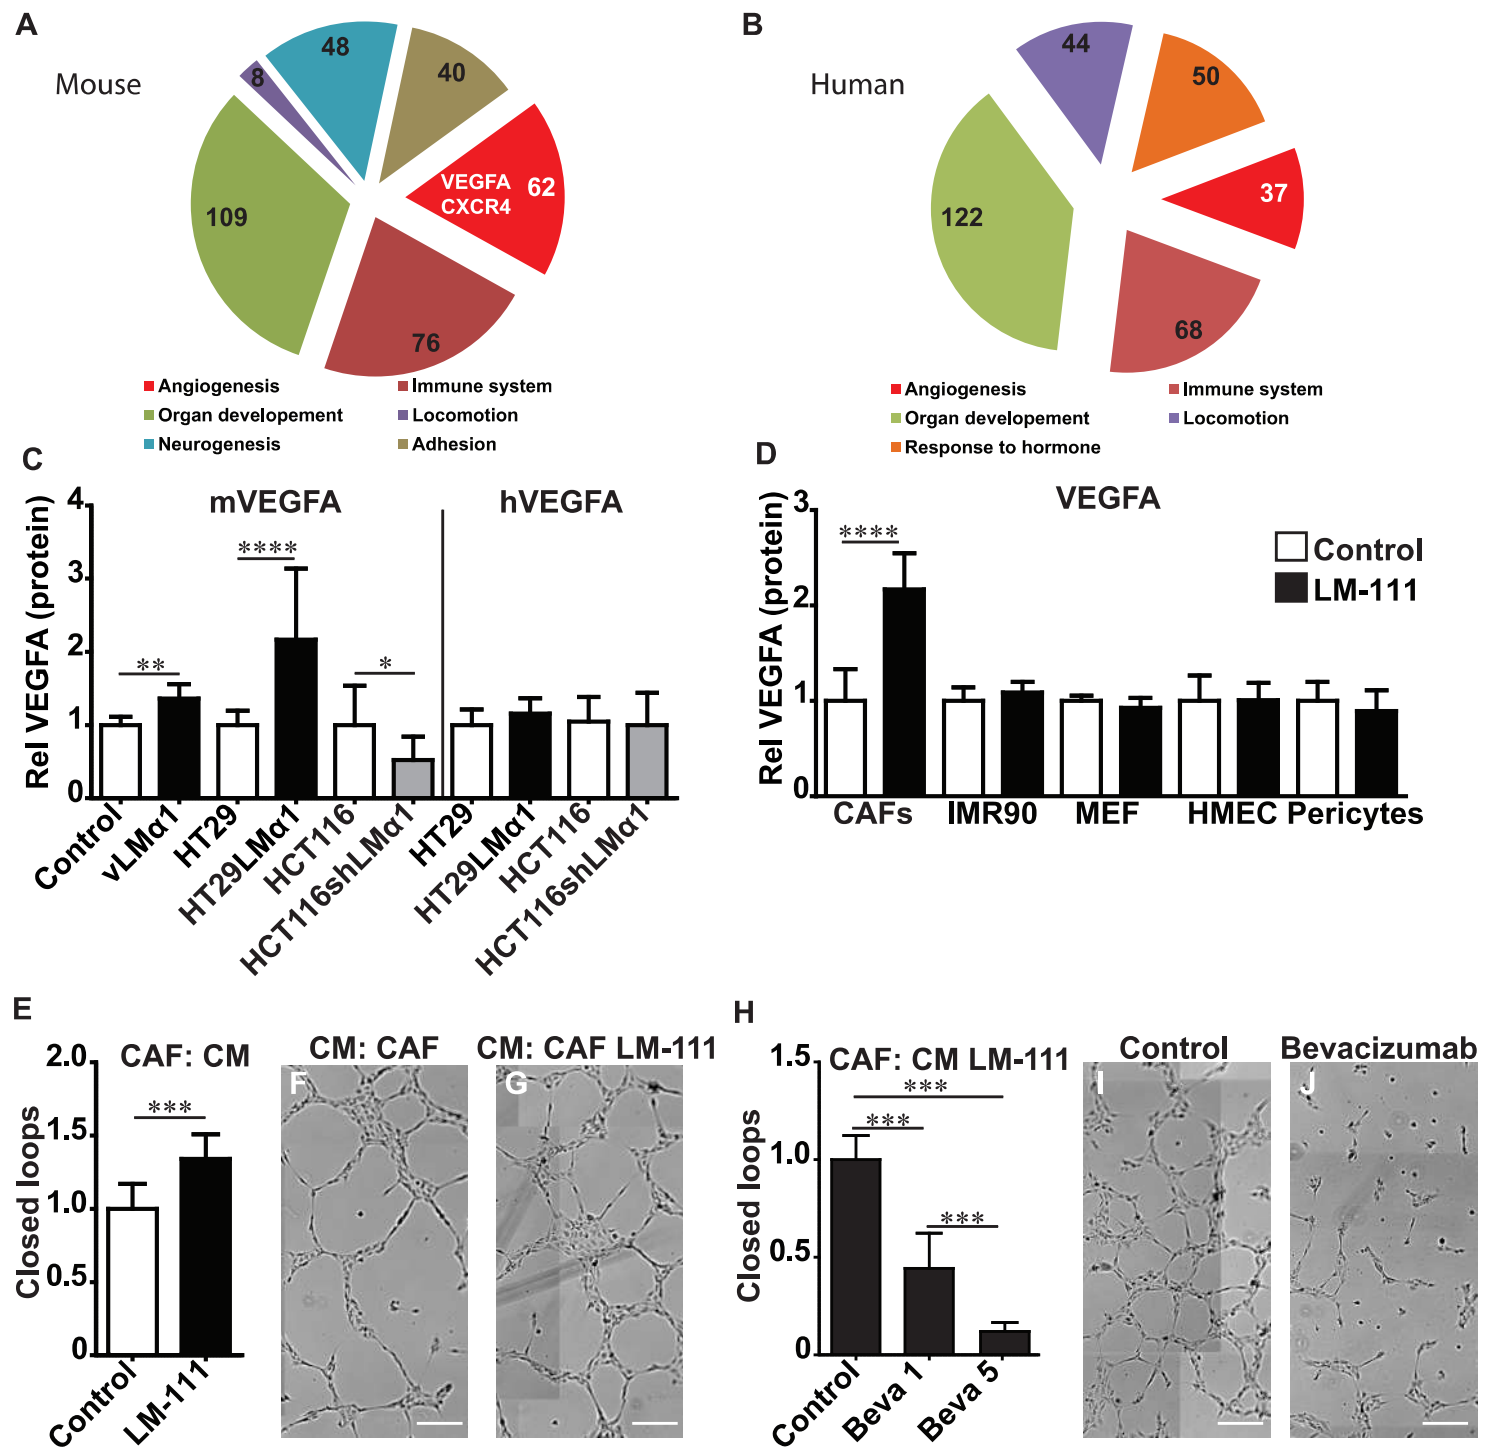

Figure 4

#### **Figure 4. Impact of LM $\alpha$ 1 on VEGFA expression and endothelial tubulogenesis**

**A**, Pie chart representation of upregulated stromal (mouse) genes implicated in different biological processes and extracted from the RNAseq analysis and using the Panther online tool. Numbers in pie chart are the number of genes in the indicated category among a total of 362 up-regulated genes. **B**, Pie chart representation of upregulated human tumoral genes implicated in different biological processes and extracted from the RNAseq analysis and using the Panther online tool. Numbers in pie chart are the number of genes in the indicated category among a total of 594 up regulated genes. **C**, Species specific expression of VEGFA in AOM/DSS induced colon tumors, and HT29 and HCT116 xenograft tumors was determined by ELISA. Fold change, mean  $\pm$  SD, N=8 mice, n=8 tumors, permutation test. **D**, ELISA expression analysis of mVEGFA and hVEGFA (mouse and human respectively) in various cultured stromal cell lines upon cell growth on a LM-111 substratum in comparison to an uncoated surface (control). Fold change, mean  $\pm$  SD, 3 independent experiments in triplicate, Student's t-test. **E**, Quantification of closed loop (tube) formation in HUVEC cells upon exposure to condition medium from CAFs previously grown on a LM-111 substratum or plastic (control). Fold change, mean  $\pm$  SD, 4 independent experiments with 5 replicates, Student's t-test. **F, G**, Representative bright field images of HUVEC tube formation upon exposure to conditioned medium (CM) from control CAFs (**F**), CAFs grown on a LM-111 substratum (**G**). Scale bar = 200 $\mu$ m. **H**, Quantification of closed loop formation of HUVEC cells upon exposure to condition medium from CAFs previously grown on a LM-111 substratum and treated with the Bevacizumab antibody at 1 (Beva 1) or 5  $\mu$ g/ml (Beva 5). Fold change, mean  $\pm$  SD, 2 independent experiments with 5 replicates, one way Anova analysis followed by a Tukey post test. **I, J**, Representative bright field images of HUVEC tube formation upon exposure to conditioned medium from CAFs grown on a LM-111 substratum, control (**I**) or treated with 5  $\mu$ g/ml bevacizumab (**J**). Scale bar = 200 $\mu$ m.

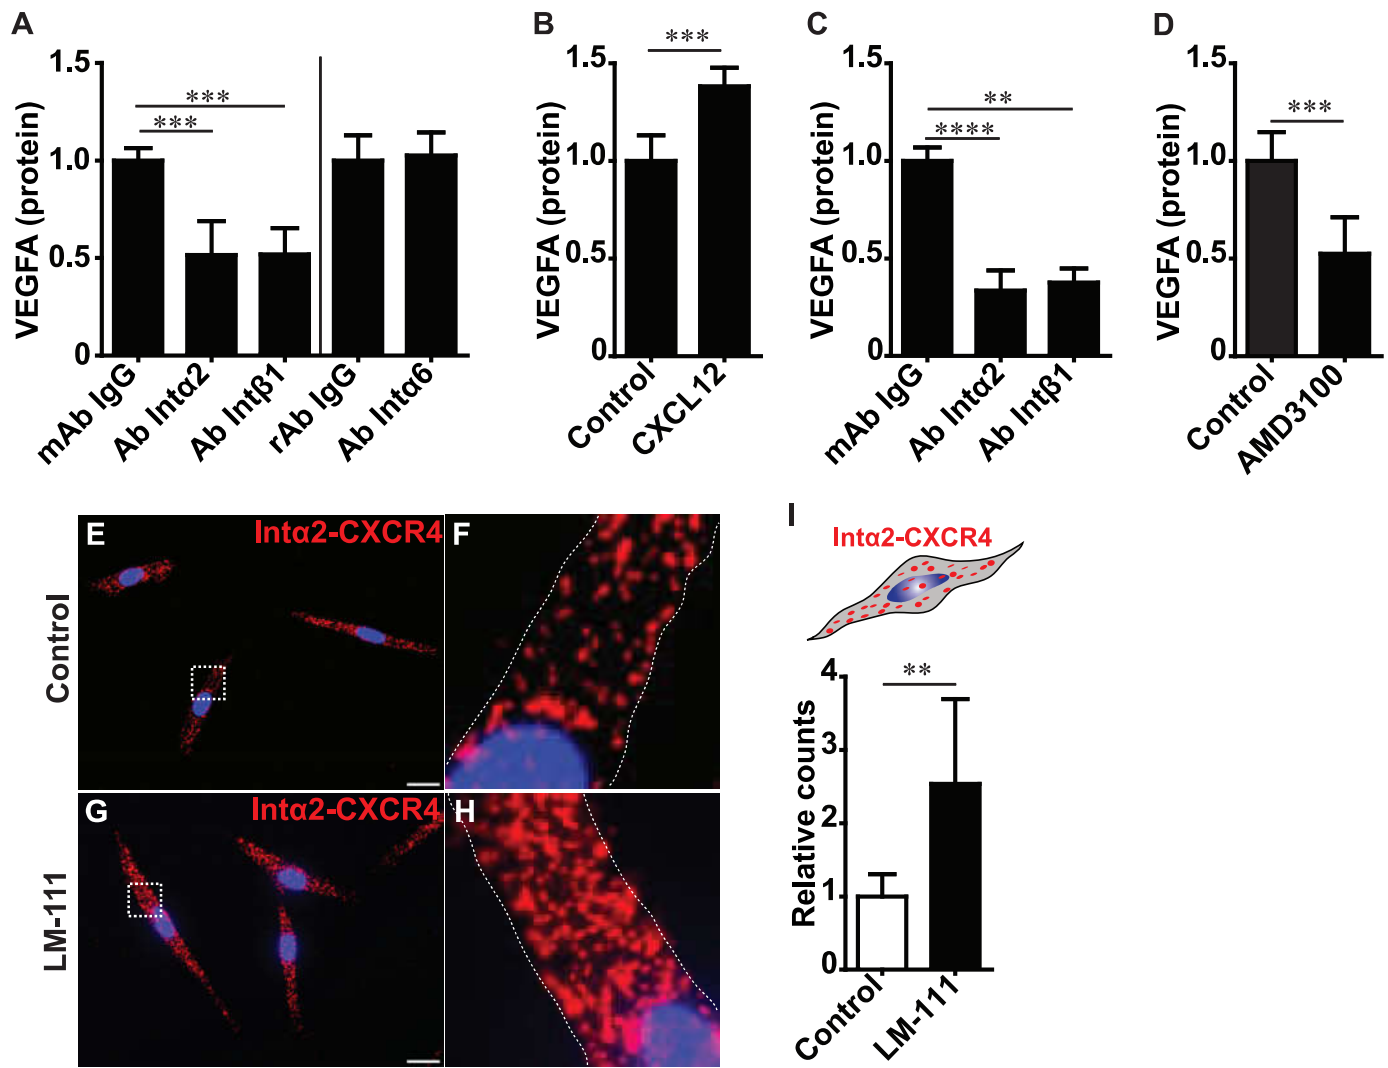

Figure 5

**Figure 5. Involvement of  $\alpha 2\beta 1$  integrin and CXCR4 in LM $\alpha$ 1 triggered VEGFA expression**

**A**, Quantification of VEGFA levels (ELISA) in CAFs upon growth on a LM-111 substratum and treatment with control (mouse or rat) IgG or antibodies blocking integrin  $\alpha 2$ ,  $\beta 1$  or  $\alpha 6$ . Fold change, mean $\pm$ SD, 3 independent experiments in triplicate, one way Anova analysis followed by a Tukey post test. **B**, ELISA expression analysis of VEGFA in CAFs upon growth on a LM-111 substratum and treated with solvent (control) or CXCL12. Fold change, mean $\pm$ SD, 3 independent experiments in triplicate, permutation test. **C**, ELISA expression analysis of VEGFA in CAFs upon growth on a LM-111 substratum, treated with CXCL12 and with control or blocking antibodies against integrin  $\alpha 2$  or  $\beta 1$ . Fold change, mean $\pm$ SD, 3 independent experiments in triplicate, one way Anova analysis followed by a permutation test. **D**, ELISA expression analysis of VEGFA in CAFs upon growth on a LM-111 substratum and treated with vehicle (control) or the CXCR4 inhibitor AMD3100. Fold change, mean $\pm$ SD, 3 independent experiments in triplicate, Student's t-test. **E-H**, Representative IF pictures of proximity ligation assay results to visualize the interaction of integrin  $\alpha 2$  with CXCR4 in CAFs upon growth on plastic (control, **E**) or a LM-111 substratum (**G**). Respective high magnification pictures are represented in (**F**) and (**H**). Nuclei were stained with DAPI (blue). Scale bar = 20 $\mu$ m. **I**, Proximity ligation assay quantification of integrin  $\alpha 2$ /CXCR4 complex formation. Mean  $\pm$ SD, 2 independent experiments in pentaplicate, Student's t-test.

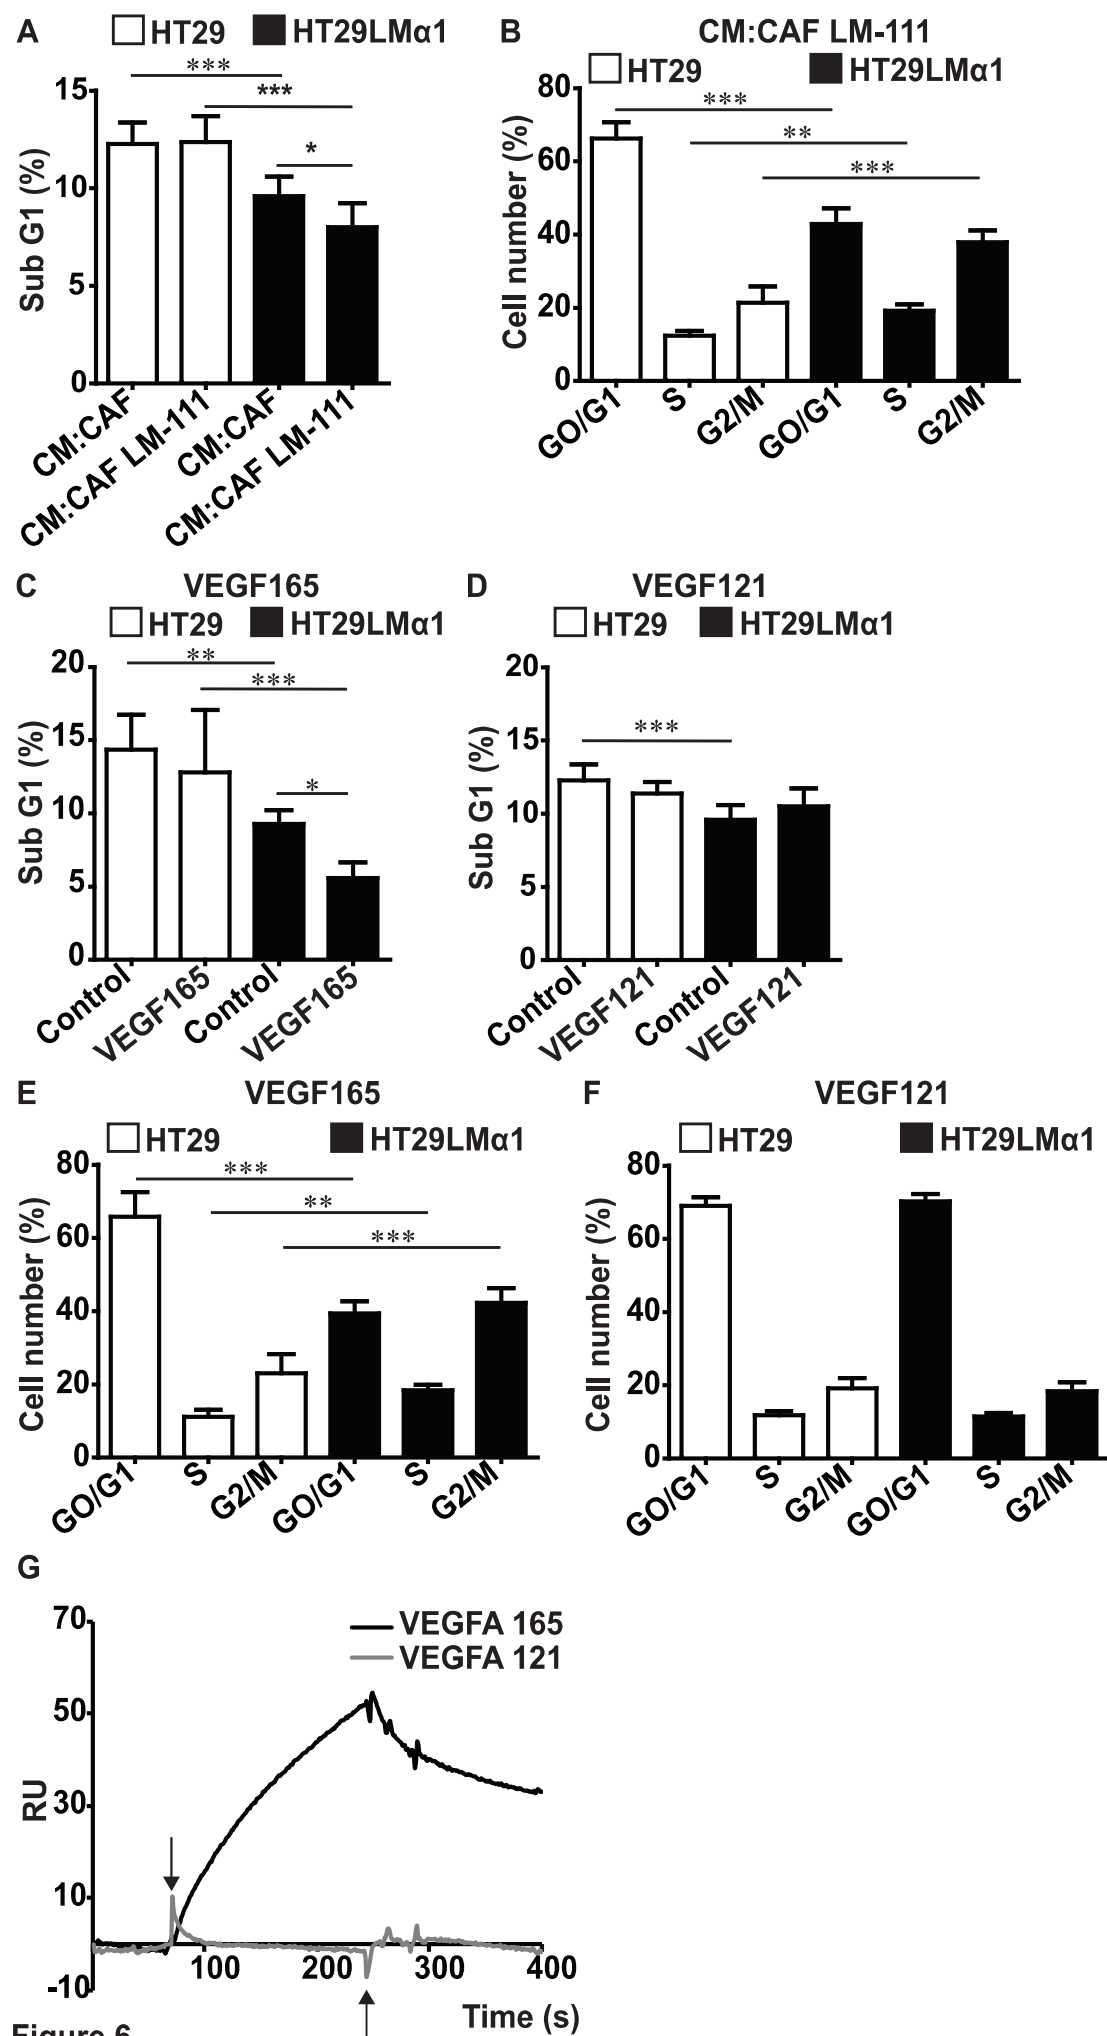

Figure 6

**Figure 6. Impact of LM $\alpha$ 1/LM-111 on VEGFA binding, survival and proliferation**

**A**, FACS analysis of the sub G1 fraction of staurosporin triggered HT29 control and HT29LM $\alpha$ 1 cells treated with conditioned medium (CM) from CAFs previously grown on a LM-111 substratum or plastic. Mean $\pm$ SD, 3 independent experiments in triplicate, one way Anova analysis followed by a Tukey post test. **B**, FACS analysis of G0/G1, S, G2/M fractions of HT29 control and HT29LM $\alpha$ 1 cells treated with conditioned medium from CAFs previously grown on a LM-111 substratum. Mean $\pm$ SD, 3 independent experiments in triplicate, one way Anova analysis followed by a Tukey post test. **C, D**, FACS determination of the sub G1 fraction of staurosporin triggered HT29 control and HT29LM $\alpha$ 1 cells treated with recombinant VEGFA165 (**C**) and VEGFA121 (**D**). Mean $\pm$ SD, 3 independent experiments in triplicate, one way Anova analysis followed by a Tukey post test. **E, F**, FACS analysis of G0/G1, S, G2/M fractions of HT29 control and HT29LM $\alpha$ 1 cells treated with recombinant VEGFA165 (**E**) and VEGFA121 (**F**). Mean $\pm$ SD, 3 independent experiments in triplicate, one way Anova analysis followed by a Tukey post test. **G**, Binding of VEGFA165 or VEGFA121 to LM-111 (adsorbed to a CM5 sensorchip) was determined by Biacore with normalization towards a blank surface. The arrows depict the beginning of the association and dissociation phases respectively (start and end point of injection). Note, contrary to VEGFA121, VEGFA165 bound to LM-111 in a dose dependent manner with a Kd of  $4.7 \times 10^{-8}$  M.

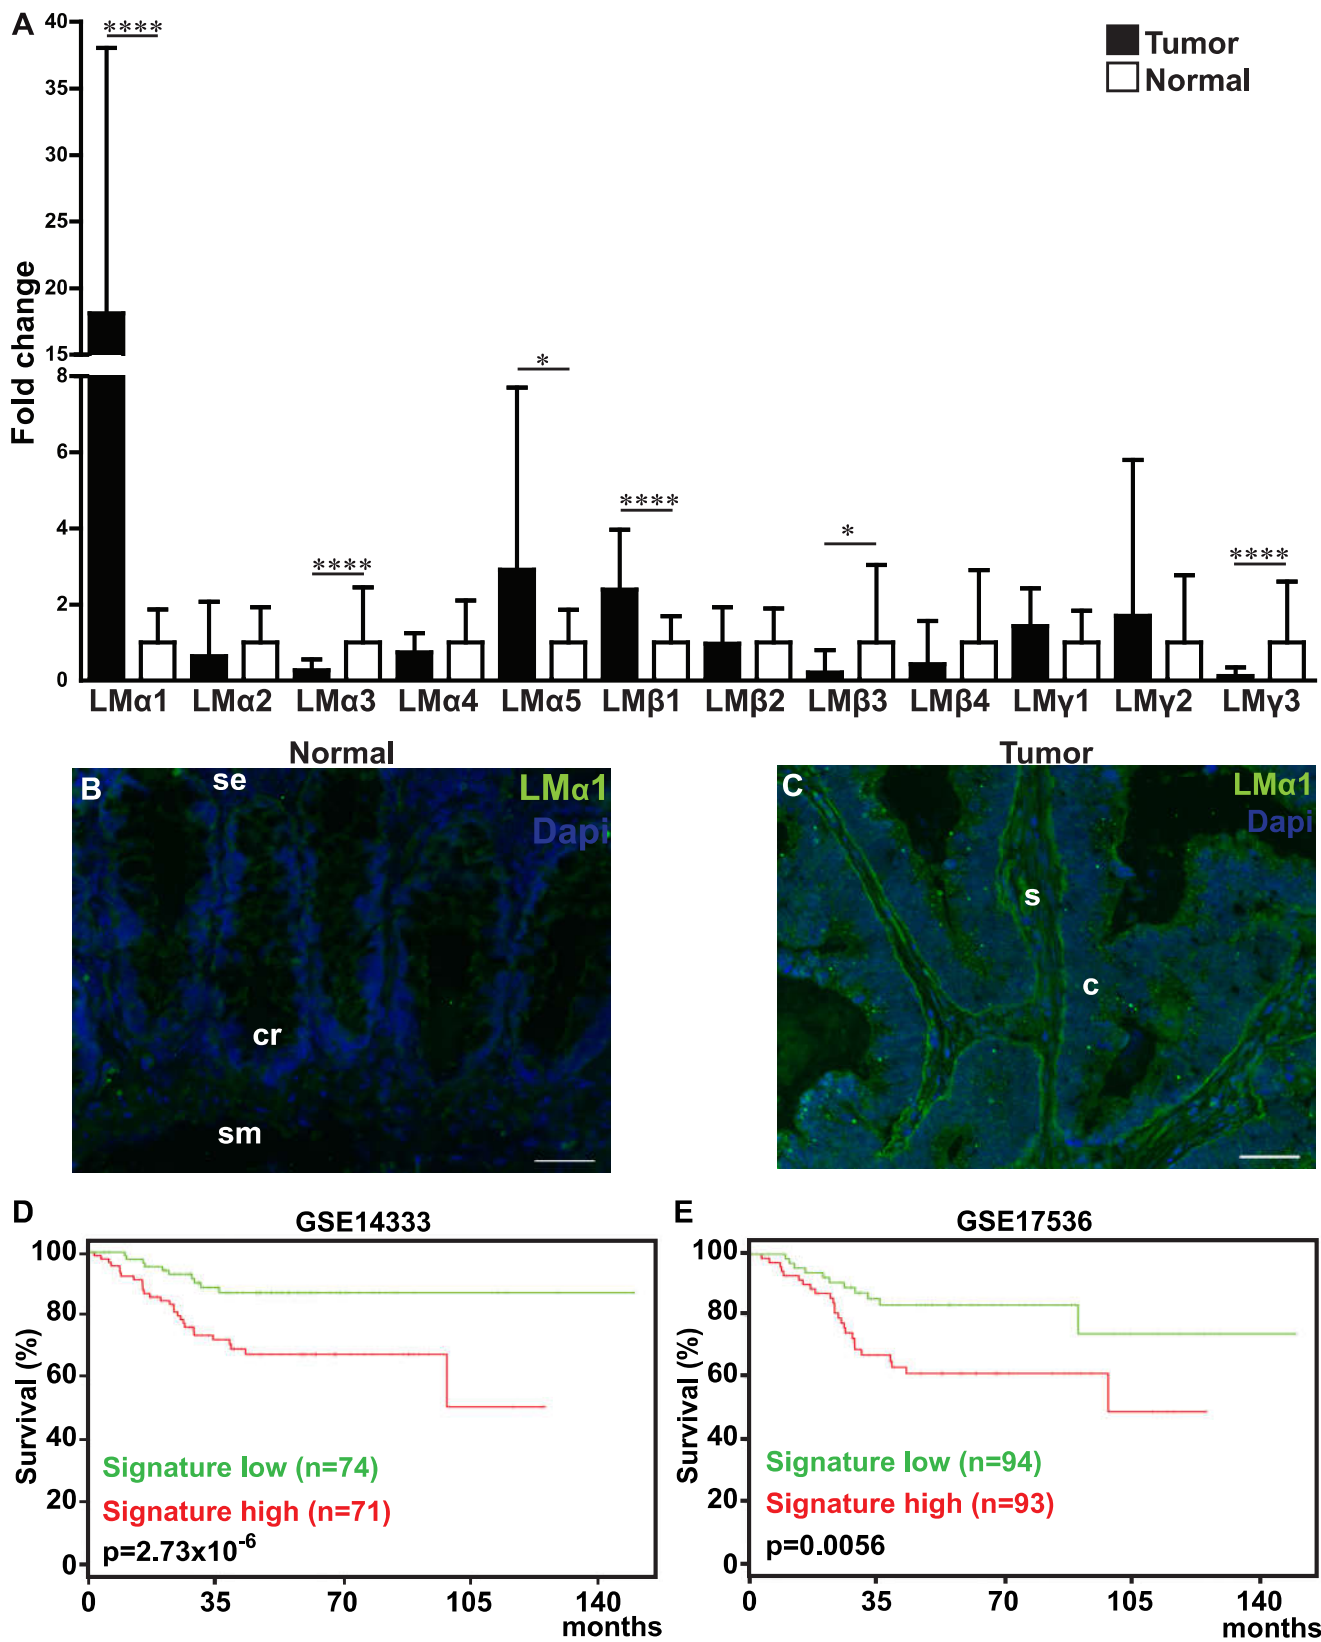

Figure 7



### Figure 7. LM $\alpha$ 1 expression in human colorectal cancer

**A**, Expression of the twelve laminin chains in human colorectal tumors was determined by qRT-PCR in 39 tumoral tissues and matched normal colon tissues. Fold change, mean $\pm$ SD, permutation test. **B, C**, Representative immunofluorescence pictures of LM $\alpha$ 1 (green) in normal human colon (**B**) and human colorectal tumor tissue (**C**). Nuclei were stained with DAPI (blue). cr, crypt; se, surface of epithelium; sm, sub-mucosa; c, cancer cells; s, stroma. Scale bar: 50 $\mu$ m. **D, E**, Kaplan-Meier survival analysis of colorectal tumor patient cohort GSE14333 (**D**) and GSE17536 (**E**). Data were stratified according to the average expression of LM $\alpha$ 1, integrin  $\alpha$ 2, integrin  $\beta$ 1, CXCR4 and VEGFA as high or low using a combined median cutoff value. Note, that in both cohorts high expression of the LM $\alpha$ 1 associated gene signature significantly correlates with decreased survival. n indicates the number of samples per group, p-values indicate the significance of survival difference between the groups of individuals.
